# Supplementary material for: Porous lanthanide–copper coordination frameworks exhibiting reversible single-crystal-to-single-crystal transformation based on variable coordination number and geometry
Source: Royal Society of Chemistry journal article supplement (doi:10.1039/b712280b), 2008-01-01
Supplement: b712280b.pdf [file b712280b.pdf]

## Supporting Informations

### The yields and elemental analysis data

Anal. Caclcd for **2a**,  $C_{32}H_{32}N_4O_{34}CuNd_2$  (1368.64): C 28.08%; H 2.36%; N 4.09%.  
Found: C 27.91%; H 2.80%; N 3.67%. The yield of **2a** is 60%.

Anal. Caclcd for **2b**,  $C_{32}H_{16}N_4O_{26}CuNd_2$  (1224.52): C 31.39%; H 1.32%; N 4.58%.  
Found: C 31.04%; H 1.76%; N 4.16%.

Anal. Caclcd for **3a**,  $C_{32}H_{32}N_4O_{34}CuSm_2$  (1380.86): C 27.83%; H 2.34%; N 4.06%.  
Found: C 27.44%; H 2.68%; N 3.67%. The yield of **3a** is 55%.

Anal. Caclcd for **3b**,  $C_{32}H_{16}N_4O_{26}CuSm_2$  (1236.76): C 31.08%; H 1.30%; N 4.53%.  
Found: C 30.85%; H 1.66%; N 4.28%.

Anal. Caclcd for **4a**,  $C_{32}H_{32}N_4O_{34}CuEu_2$  (1384.088): C 27.77%; H 2.33%; N 4.05%.  
Found: C 27.39%; H 2.86%; N 3.72%. The yield of **4a** is 65%.

Anal. Caclcd for **4b**,  $C_{32}H_{16}N_4O_{26}CuEu_2$  (1239.96): C 30.96%; H 1.29%; N 4.52%.  
Found: C 30.74%; H 1.75%; N 4.08%.

Anal. Caclcd for **5a**,  $C_{32}H_{32}N_4O_{34}CuTb_2$  (1398.00): C 27.49%; H 2.31%; N 4.01 %.  
Found: C 27.64%; H 2.68%; N 3.85%. The yield of **5a** is 65%.

Anal. Caclcd for **5b**,  $C_{32}H_{16}N_4O_{26}CuTb_2$  (1253.90): C 30.65%; H 1.29%; N 4.47%.  
Found: C 30.44%; H 1.61%; N 4.18%.

Anal. Caclcd for **6a**,  $C_{32}H_{32}N_4O_{34}CuDy_2$  (1405.16): C 27.35%; H 2.30%; N 3.99 %.  
Found: C 27.04%; H 2.78%; N 3.68%. The yield of **6a** is 60%.

Anal. Caclcd for **6b**,  $C_{32}H_{16}N_4O_{26}CuDy_2$  (1261.04): C 30.45%; H 1.27%; N 4.44%.  
Found: C 30.34%; H 1.63%; N 4.27%.

Anal. Caclcd for **7a**,  $C_{32}H_{32}N_4O_{34}CuHo_2$  (1410.02): C 27.26%; H 2.29%; N 3.97%.  
Found: C 26.84%; H 1.96%; N 3.54%. The yield of **7a** is 70%.

Anal. Caclcd for **7b**,  $C_{32}H_{16}N_4O_{26}CuHo_2$  (1265.89): C 30.36%; H 1.27%; N 4.43%.  
Found: C 29.42%; H 1.62%; N 4.09%.

Anal. Caclcd for **8a**,  $C_{32}H_{32}N_4O_{34}CuEr_2$  (1414.69): C 27.17%; H 2.28%; N 3.96%.  
Found: C 26.84%; H 2.72%; N 3.64%. The yield of **8a** is 65%.

Anal. Calcd for **8b**,  $C_{32}H_{16}N_4O_{26}CuEr_2$  (1270.56): C 30.25%; H 1.27%; N 4.41%. Found: C 30.04%; H 1.66%; N 4.09%.

Anal. Calcd for **La-1**,  $C_{24}H_{18}N_3O_{22}CuLa$  (902.86): C 31.93%; H 1.99%; N 4.65%. Found: C 32.16%; H 1.84%; N 4.53%. The yield of **La-1** is 45%.

Anal. Calcd for **La-2**,  $C_{32}H_{16}N_4O_{26}CuLa_2$  (1213.85): C 31.66%; H 1.33%; N 4.62%. Found: C 31.84%; H 1.17%; N 4.29%. The yield of **La-2** is 25%.

Anal. Calcd for **Ce-1**,  $C_{32}H_{24}N_4O_{30}CuCe_2$  (1288.33): C 29.83%; H 1.88%; N 4.35%. Found: C 29.54%; H 2.03%; N 4.18%. The yield of **Ce-1** is 60%.

Anal. Calcd for **Pr-a**,  $C_{32}H_{32}N_4O_{34}CuPr_2$  (1361.98): C 28.22%; H 2.37%; N 4.11%. Found: C 27.84%; H 2.75%; N 3.92%. The yield of **Pr-a** is 60%.

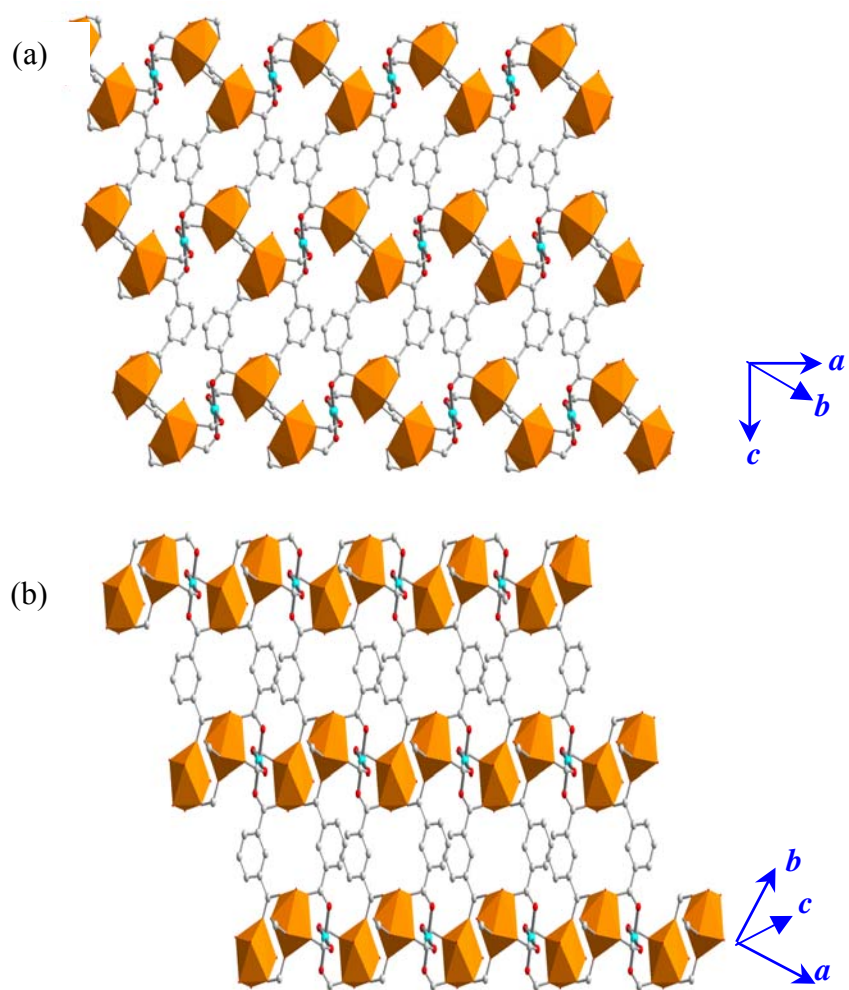

**Fig. S1.** Perspective views of the different two-dimensional layers in **1a**; the nitryl groups are omitted for clarity. Gd: yellow; Cu: pale blue; O red; C: grey.

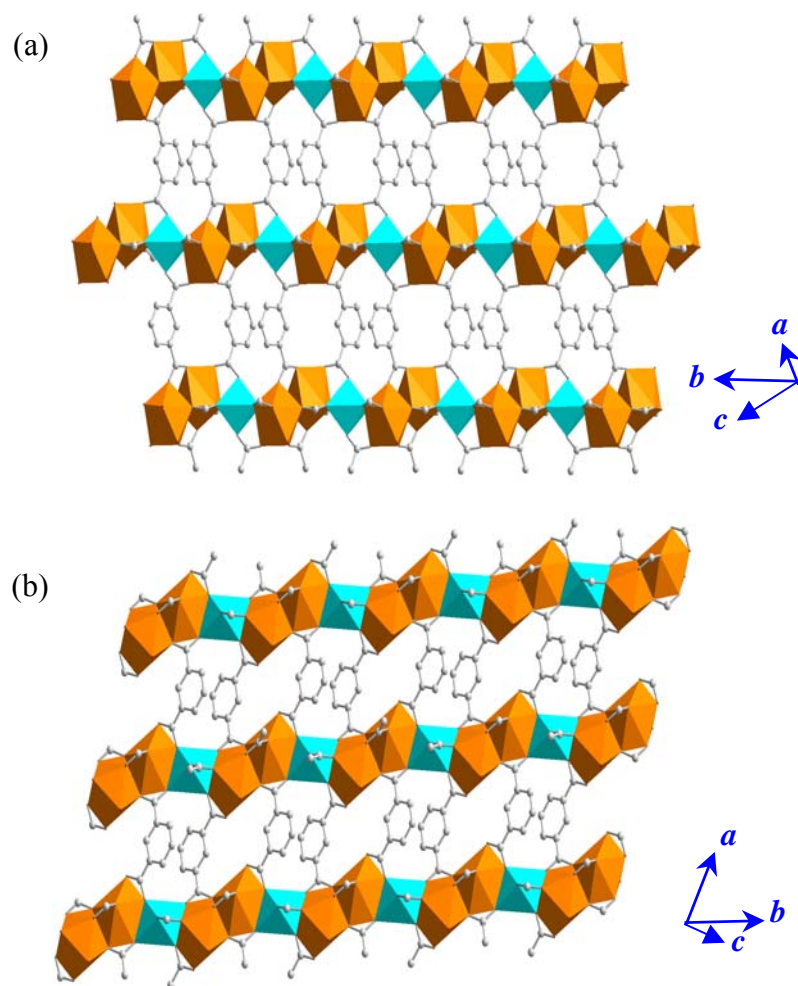

**Fig. S2.** Perspective views of the different two-dimensional layers in **1b**; the nitril groups are omitted for clarity. Gd: yellow; Cu: pale blue; O red; C: grey.

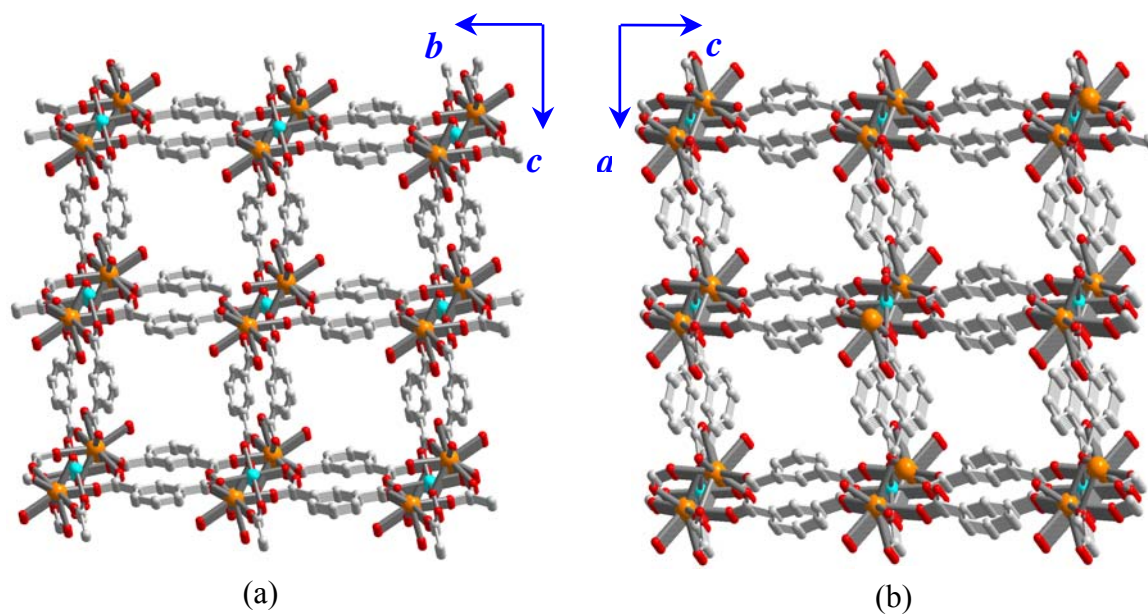

**Fig. S3.** Perspective views of the three-dimensional framework for **1a** (a) and **1b** (b), the guest water molecules and nitril groups are omitted for clarity. Gd: yellow; Cu: pale blue; O red; C: grey.

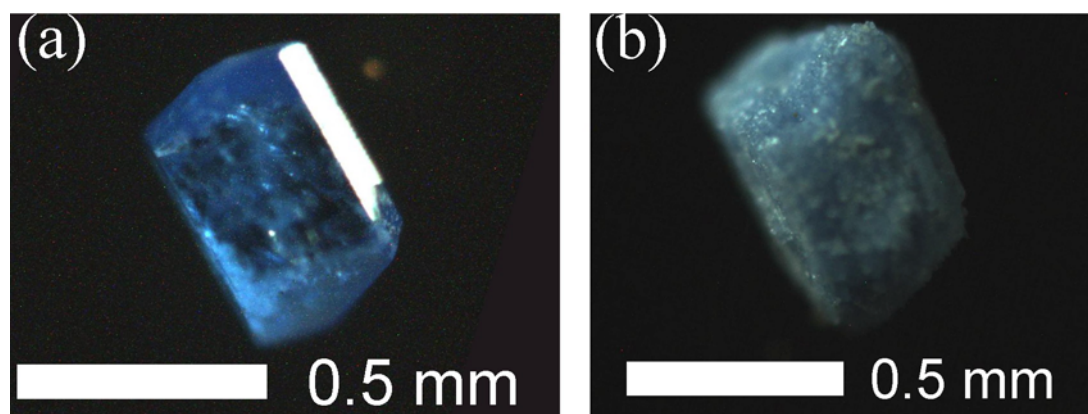

**Fig. S4.** Optical images of the same piece of crystal (**1a**), the original crystal (a) and after handle of crystal (b).

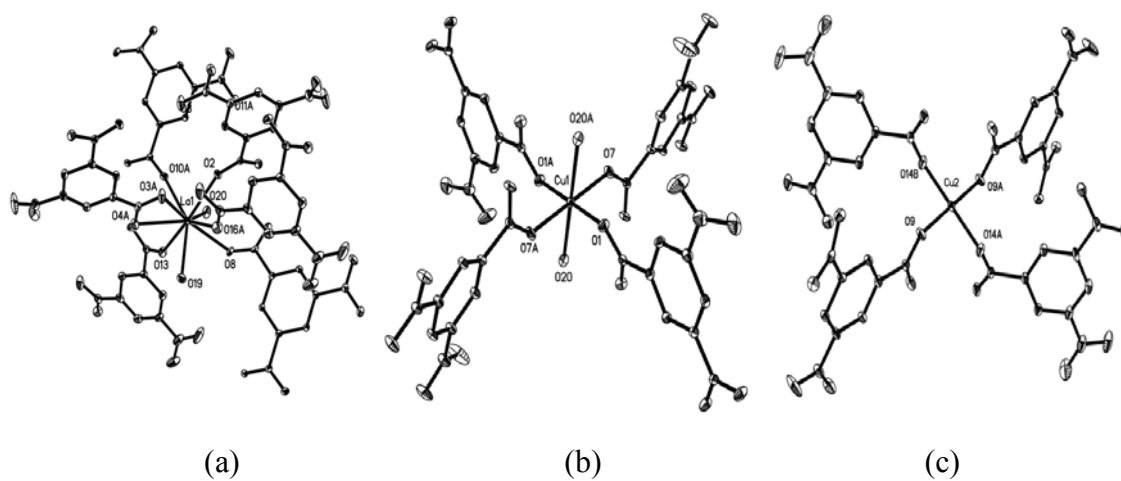

**Fig. S5.** Perspective views of the coordination environments of the metal centers in **La-1** with atoms represented by 30% thermal ellipsoids. Symmetry code: (A)  $x+1, y, z$ .

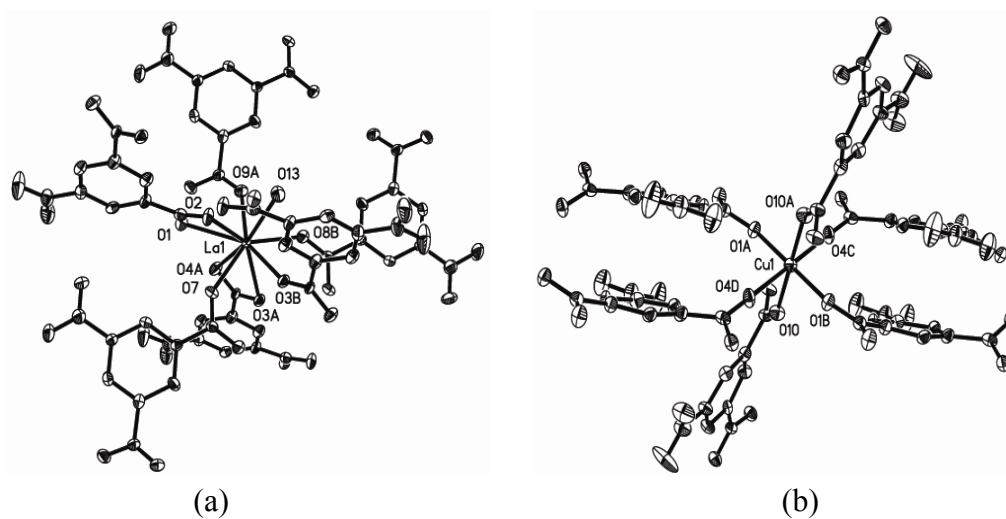

**Fig. S6.** Perspective views of the coordination environments of the metal centers in **La-2** with atoms represented by 30% thermal ellipsoids. Symmetry code: (A)  $-x+1, -y+2, -z+1$  ; (B)  $x, y, z-1$  ; (C)  $-x, -y+2, -z+1$  ; (D)  $x+1, y, z$ .

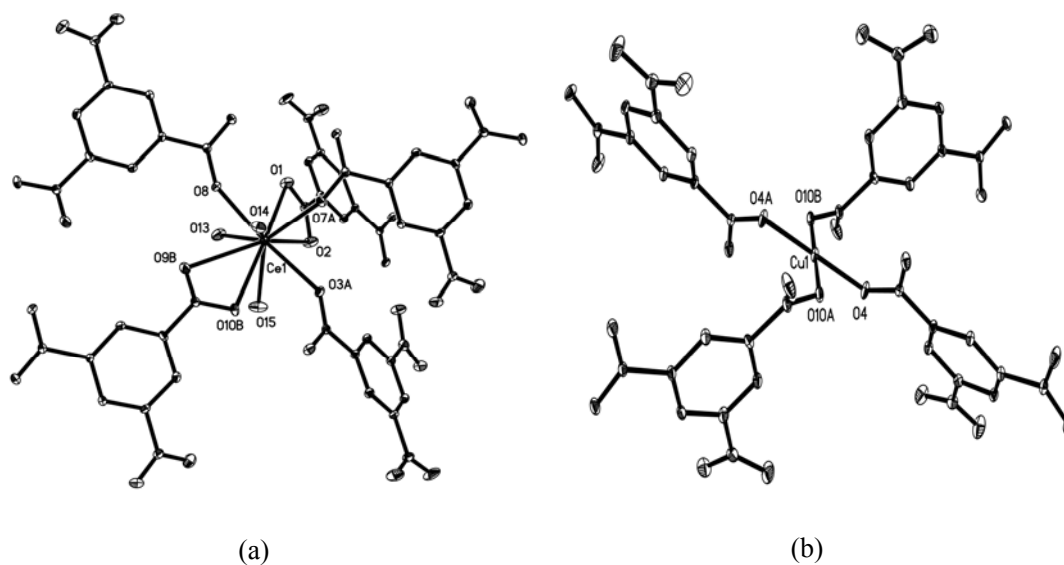

**Fig. S7.** Perspective views of the coordination environments of the metal centers in **Ce-1** with atoms represented by 30% thermal ellipsoids. Symmetry code: (A)  $-x, -y+1, -z+1$  ; (B)  $-x-1, -y+2, -z+1$ .

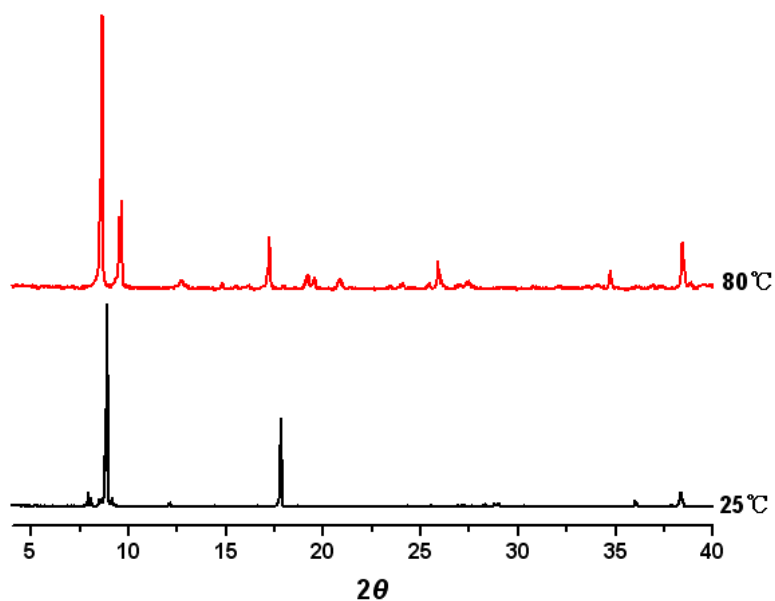

**Fig. S8.** XRD patterns for **1a** recorded at 25 °C and after being heated at 80 °C.

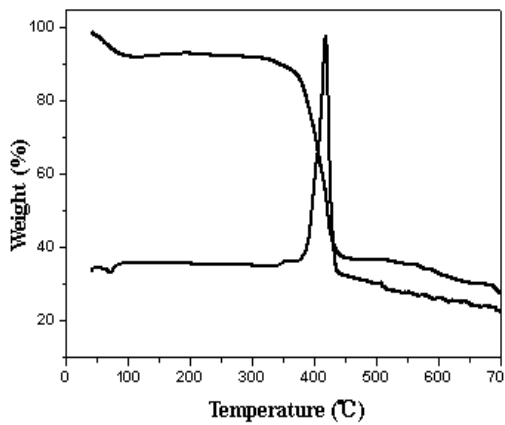

(a)

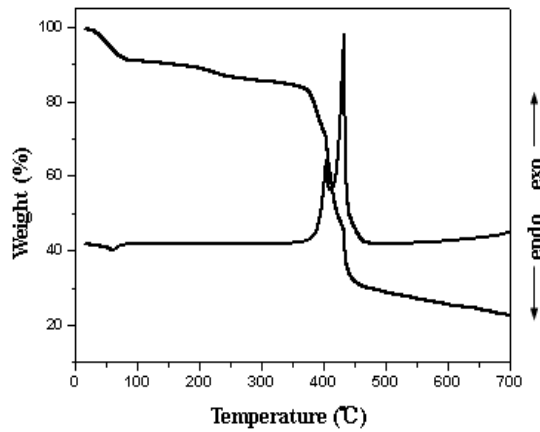

(b)

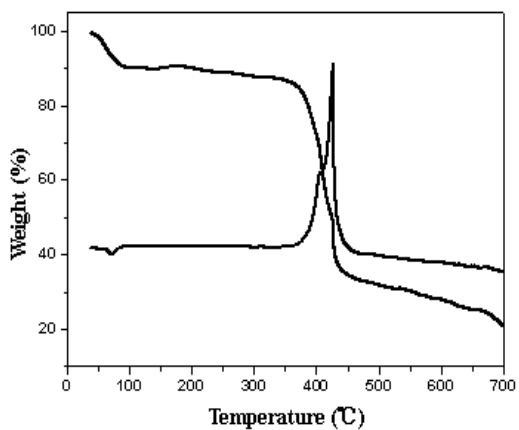

(c)

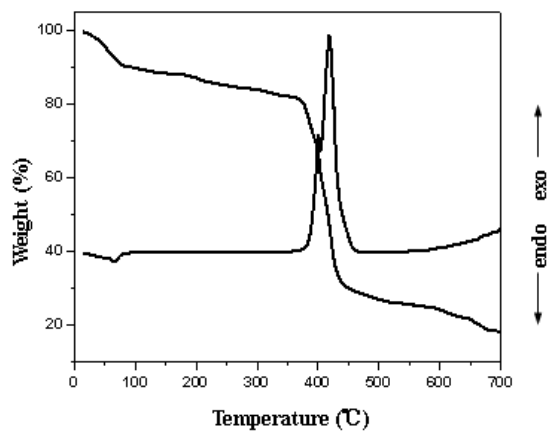

(d)

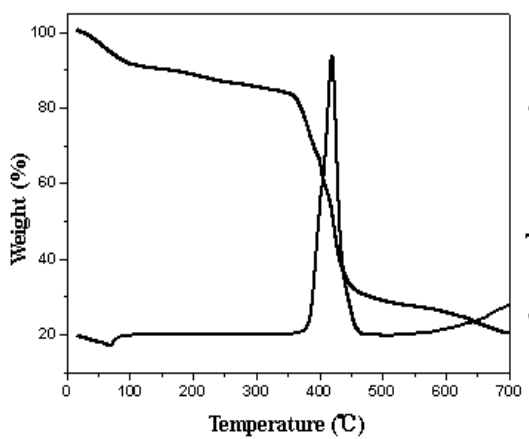

(e)

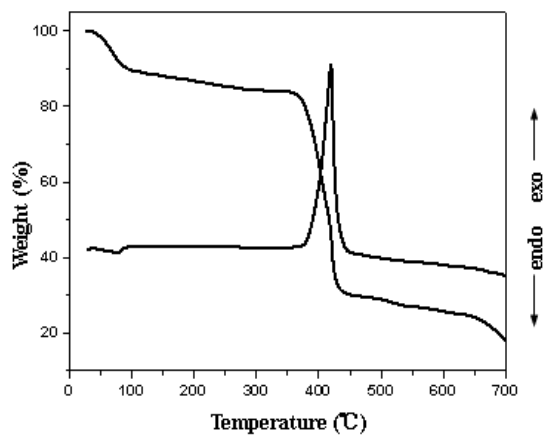

(f)



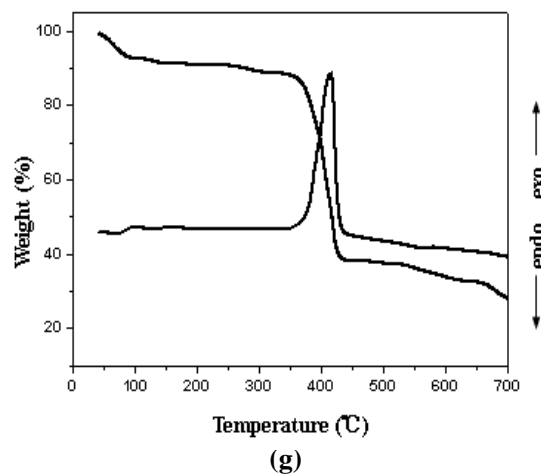

**Fig. S9.** TG-DTA curves for **2a** (a), **3a** (b), **4a** (c), **5a** (d), **6a** (e), **7a** (f) and **8a** (g).

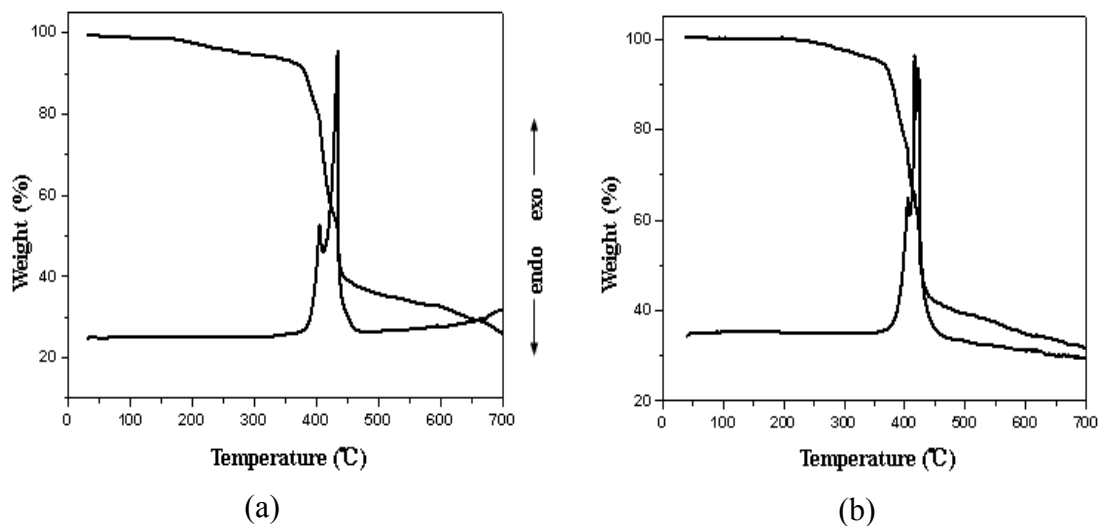

**Fig. S10.** TGA-DTA curves for **3b** (a), **4b** (b) in air.

**Table S1.** Crystallographic Data and Structure Refinements for **1(a,b)-8(a,b)**.

|                                         | <b>1a</b>                                                                        | <b>1b</b>                                                                        | <b>2a</b>                                                                        | <b>2b</b>                                                                        |
|-----------------------------------------|----------------------------------------------------------------------------------|----------------------------------------------------------------------------------|----------------------------------------------------------------------------------|----------------------------------------------------------------------------------|
| Empirical formula                       | C <sub>32</sub> H <sub>32</sub> N <sub>4</sub> O <sub>34</sub> CuGd <sub>2</sub> | C <sub>32</sub> H <sub>16</sub> N <sub>4</sub> O <sub>26</sub> CuGd <sub>2</sub> | C <sub>32</sub> H <sub>32</sub> N <sub>4</sub> O <sub>34</sub> CuNd <sub>2</sub> | C <sub>32</sub> H <sub>16</sub> N <sub>4</sub> O <sub>26</sub> CuNd <sub>2</sub> |
| Formula weight                          | 1394.66                                                                          | 1250.54                                                                          | 1368.64                                                                          | 1224.52                                                                          |
| Crystal system                          | Triclinic                                                                        | Triclinic                                                                        | Triclinic                                                                        | Triclinic                                                                        |
| Space group                             | <i>P-1</i>                                                                       | <i>P-1</i>                                                                       | <i>P-1</i>                                                                       | <i>P-1</i>                                                                       |
| a (Å)                                   | 10.464(2)                                                                        | 9.815(2)                                                                         | 10.546(2)                                                                        | 9.849(2)                                                                         |
| b (Å)                                   | 10.607(2)                                                                        | 10.285(2)                                                                        | 10.653(2)                                                                        | 10.440(2)                                                                        |
| c (Å)                                   | 11.353(2)                                                                        | 10.957(2)                                                                        | 11.422(2)                                                                        | 11.057(2)                                                                        |
| α (°)                                   | 83.08(3)                                                                         | 70.75(3)                                                                         | 82.68(3)                                                                         | 70.65(3)                                                                         |
| β (°)                                   | 74.54(3)                                                                         | 85.05(3)                                                                         | 74.10(3)                                                                         | 84.44(3)                                                                         |
| γ (°)                                   | 69.67(3)                                                                         | 71.09(3)                                                                         | 69.42(3)                                                                         | 70.73(3)                                                                         |
| Volume (Å <sup>3</sup> )                | 1138.4(4)                                                                        | 987.6(3)                                                                         | 1154.8(4)                                                                        | 1012.5(3)                                                                        |
| Z                                       | 1                                                                                | 1                                                                                | 1                                                                                | 1                                                                                |
| D <sub>Calc</sub> (mg/m <sup>-3</sup> ) | 2.034                                                                            | 2.103                                                                            | 1.968                                                                            | 2.008                                                                            |
| μ (mm <sup>-1</sup> )                   | 3.457                                                                            | 3.957                                                                            | 2.784                                                                            | 3.149                                                                            |
| F <sub>(000)</sub>                      | 681                                                                              | 601                                                                              | 673                                                                              | 593                                                                              |
| Data /restraints<br>/parameters         | 5178 / 0 / 331                                                                   | 4410 / 6 / 295                                                                   | 5237 / 0 / 331                                                                   | 3648 / 0 / 295                                                                   |
| GoF                                     | 1.026                                                                            | 1.071                                                                            | 1.095                                                                            | 0.0987                                                                           |
| R <sub>1</sub> [I>2σ(I)] <sup>a</sup>   | 0.0265                                                                           | 0.0704                                                                           | 0.0365                                                                           | 0.0861                                                                           |
| wR <sub>2</sub> [I>2σ(I)] <sup>a</sup>  | 0.0957                                                                           | 0.1866                                                                           | 0.0950                                                                           | 0.01988                                                                          |
| R <sub>1</sub> (all data) <sup>a</sup>  | 0.0277                                                                           | 0.0832                                                                           | 0.0393                                                                           | 0.0949                                                                           |
| wR <sub>2</sub> (all data) <sup>a</sup> | 0.0992                                                                           | 0.2011                                                                           | 0.0963                                                                           | 0.2053                                                                           |
|                                         | <b>3a</b>                                                                        | <b>3b</b>                                                                        | <b>4a</b>                                                                        | <b>4b</b>                                                                        |
| Empirical formula                       | C <sub>32</sub> H <sub>32</sub> N <sub>4</sub> O <sub>34</sub> CuSm <sub>2</sub> | C <sub>32</sub> H <sub>16</sub> N <sub>4</sub> O <sub>26</sub> CuSm <sub>2</sub> | C <sub>32</sub> H <sub>32</sub> N <sub>4</sub> O <sub>34</sub> CuEu <sub>2</sub> | C <sub>32</sub> H <sub>16</sub> N <sub>4</sub> O <sub>26</sub> CuEu <sub>2</sub> |
| Formula weight                          | 1380.86                                                                          | 1236.76                                                                          | 1384.08                                                                          | 1239.96                                                                          |
| Crystal system                          | Triclinic                                                                        | Triclinic                                                                        | Triclinic                                                                        | Triclinic                                                                        |
| Space group                             | <i>P-1</i>                                                                       | <i>P-1</i>                                                                       | <i>P-1</i>                                                                       | <i>P-1</i>                                                                       |
| a (Å)                                   | 10.528(2)                                                                        | 9.849(2)                                                                         | 10.500(2)                                                                        | 9.833(2)                                                                         |
| b (Å)                                   | 10.671(2)                                                                        | 10.341(2)                                                                        | 10.635(2)                                                                        | 10.222(2)                                                                        |
| c (Å)                                   | 11.378(2)                                                                        | 10.999(2)                                                                        | 11.373(2)                                                                        | 11.026(2)                                                                        |
| α (°)                                   | 83.14(3)                                                                         | 70.72(3)                                                                         | 82.98(3)                                                                         | 71.83(3)                                                                         |
| β (°)                                   | 74.61(3)                                                                         | 84.80(3)                                                                         | 74.42(3)                                                                         | 84.19(3)                                                                         |
| γ (°)                                   | 69.34(3)                                                                         | 70.78(3)                                                                         | 69.60(3)                                                                         | 71.53(3)                                                                         |
| Volume (Å <sup>3</sup> )                | 1152.7(4)                                                                        | 998.3(3)                                                                         | 1146.2(4)                                                                        | 999.3(3)                                                                         |
| Z                                       | 1                                                                                | 1                                                                                | 1                                                                                | 1                                                                                |
| D <sub>Calc</sub> (mg/m <sup>-3</sup> ) | 1.989                                                                            | 2.057                                                                            | 2.005                                                                            | 2.061                                                                            |
| μ (mm <sup>-1</sup> )                   | 3.084                                                                            | 3.534                                                                            | 3.276                                                                            | 3.731                                                                            |
| F <sub>(000)</sub>                      | 677                                                                              | 597                                                                              | 679                                                                              | 599                                                                              |
| Data /restraints<br>/parameters         | 5187 / 0 / 331                                                                   | 3725 / 0 / 295                                                                   | 5193 / 0 / 331                                                                   | 3779 / 0 / 295                                                                   |

|                                         |                                                                                  |                                                                                  |                                                                                  |                                                                                  |
|-----------------------------------------|----------------------------------------------------------------------------------|----------------------------------------------------------------------------------|----------------------------------------------------------------------------------|----------------------------------------------------------------------------------|
| GoF                                     | 1.052                                                                            | 1.028                                                                            | 1.150                                                                            | 1.072                                                                            |
| $R_1 [I > 2\sigma(I)]^a$                | 0.0331                                                                           | 0.0661                                                                           | 0.0299                                                                           | 0.0777                                                                           |
| $wR_2 [I > 2\sigma(I)]^a$               | 0.1209                                                                           | 0.1739                                                                           | 0.0908                                                                           | 0.2070                                                                           |
| $R_1$ (all data) <sup>a</sup>           | 0.0347                                                                           | 0.0703                                                                           | 0.0322                                                                           | 0.0845                                                                           |
| $wR_2$ (all data) <sup>a</sup>          | 0.1218                                                                           | 0.1780                                                                           | 0.0975                                                                           | 0.2130                                                                           |
|                                         | <b>5a</b>                                                                        | <b>5b</b>                                                                        | <b>6a</b>                                                                        | <b>6b</b>                                                                        |
| Empirical formula                       | C <sub>32</sub> H <sub>32</sub> N <sub>4</sub> O <sub>34</sub> CuTb <sub>2</sub> | C <sub>32</sub> H <sub>16</sub> N <sub>4</sub> O <sub>26</sub> CuTb <sub>2</sub> | C <sub>32</sub> H <sub>32</sub> N <sub>4</sub> O <sub>34</sub> CuDy <sub>2</sub> | C <sub>32</sub> H <sub>16</sub> N <sub>4</sub> O <sub>26</sub> CuDy <sub>2</sub> |
| Formula weight                          | 1398.00                                                                          | 1253.90                                                                          | 1405.16                                                                          | 1261.04                                                                          |
| Crystal system                          | Triclinic                                                                        | Triclinic                                                                        | Triclinic                                                                        | Triclinic                                                                        |
| Space group                             | <i>P-1</i>                                                                       | <i>P-1</i>                                                                       | <i>P-1</i>                                                                       | <i>P-1</i>                                                                       |
| a (Å)                                   | 10.445(2)                                                                        | 9.829(2)                                                                         | 10.425(2)                                                                        | 9.805(2)                                                                         |
| b (Å)                                   | 10.636(2)                                                                        | 10.242(2)                                                                        | 10.620(2)                                                                        | 10.235(2)                                                                        |
| c (Å)                                   | 11.326(2)                                                                        | 10.948(2)                                                                        | 11.323(2)                                                                        | 10.981(2)                                                                        |
| α (°)                                   | 83.28(3)                                                                         | 70.76(3)                                                                         | 83.41(3)                                                                         | 70.29(3)                                                                         |
| β (°)                                   | 74.83(3)                                                                         | 84.94(3)                                                                         | 74.96(3)                                                                         | 86.24(3)                                                                         |
| γ (°)                                   | 69.60(3)                                                                         | 71.26(3)                                                                         | 69.67(3)                                                                         | 71.16(3)                                                                         |
| Volume (Å <sup>3</sup> )                | 1137.8(4)                                                                        | 985.2(3)                                                                         | 1134.7(4)                                                                        | 980.7(3)                                                                         |
| Z                                       | 1                                                                                | 1                                                                                | 1                                                                                | 1                                                                                |
| D <sub>calc</sub> (mg/m <sup>-3</sup> ) | 2.040                                                                            | 2.113                                                                            | 2.056                                                                            | 2.135                                                                            |
| μ (mm <sup>-1</sup> )                   | 3.652                                                                            | 4.190                                                                            | 3.838                                                                            | 4.413                                                                            |
| F <sub>(000)</sub>                      | 683                                                                              | 603                                                                              | 685                                                                              | 605                                                                              |
| Data /restraints<br>/parameters         | 5171 / 0 / 331                                                                   | 4418 / 0 / 295                                                                   | 5163 / 0 / 331                                                                   | 4438 / 6 / 295                                                                   |
| GoF                                     | 1.026                                                                            | 1.056                                                                            | 1.076                                                                            | 1.077                                                                            |
| $R_1 [I > 2\sigma(I)]^a$                | 0.0273                                                                           | 0.0579                                                                           | 0.0257                                                                           | 0.0341                                                                           |
| $wR_2 [I > 2\sigma(I)]^a$               | 0.0800                                                                           | 0.1525                                                                           | 0.0752                                                                           | 0.1049                                                                           |
| $R_1$ (all data) <sup>a</sup>           | 0.0288                                                                           | 0.0631                                                                           | 0.0273                                                                           | 0.0370                                                                           |
| $wR_2$ (all data) <sup>a</sup>          | 0.0843                                                                           | 0.1561                                                                           | 0.0809                                                                           | 0.1062                                                                           |
|                                         | <b>7a</b>                                                                        | <b>7b</b>                                                                        | <b>8a</b>                                                                        | <b>8b</b>                                                                        |
| Empirical formula                       | C <sub>32</sub> H <sub>32</sub> N <sub>4</sub> O <sub>34</sub> CuHo <sub>2</sub> | C <sub>32</sub> H <sub>16</sub> N <sub>4</sub> O <sub>26</sub> CuHo <sub>2</sub> | C <sub>32</sub> H <sub>32</sub> N <sub>4</sub> O <sub>34</sub> CuEr <sub>2</sub> | C <sub>32</sub> H <sub>16</sub> N <sub>4</sub> O <sub>26</sub> CuEr <sub>2</sub> |
| Formula weight                          | 1410.02                                                                          | 1265.90                                                                          | 1414.69                                                                          | 1270.56                                                                          |
| Crystal system                          | Triclinic                                                                        | Triclinic                                                                        | Triclinic                                                                        | Triclinic                                                                        |
| Space group                             | <i>P-1</i>                                                                       | <i>P-1</i>                                                                       | <i>P-1</i>                                                                       | <i>P-1</i>                                                                       |
| a (Å)                                   | 10.414(2)                                                                        | 9.795(2)                                                                         | 10.399(2)                                                                        | 9.779(2)                                                                         |
| b (Å)                                   | 10.615(2)                                                                        | 10.221(2)                                                                        | 10.606(2)                                                                        | 10.195(2)                                                                        |
| c (Å)                                   | 11.317(2)                                                                        | 10.940(2)                                                                        | 11.300(2)                                                                        | 10.951(2)                                                                        |
| α (°)                                   | 83.45(3)                                                                         | 70.80(3)                                                                         | 83.50(3)                                                                         | 70.27(3)                                                                         |
| β (°)                                   | 75.04(3)                                                                         | 84.87(3)                                                                         | 75.15(3)                                                                         | 86.24(3)                                                                         |
| γ (°)                                   | 69.61(3)                                                                         | 71.50(3)                                                                         | 69.62(3)                                                                         | 71.41(3)                                                                         |
| Volume (Å <sup>3</sup> )                | 1132.5(4)                                                                        | 980.7(3)                                                                         | 1128.9(4)                                                                        | 973.0(3)                                                                         |
| Z                                       | 1                                                                                | 1                                                                                | 1                                                                                | 1                                                                                |
| D <sub>calc</sub> (mg/m <sup>-3</sup> ) | 2.067                                                                            | 2.143                                                                            | 2.081                                                                            | 2.168                                                                            |
| μ (mm <sup>-1</sup> )                   | 4.040                                                                            | 4.637                                                                            | 4.265                                                                            | 4.921                                                                            |

|                                 |                |                |                |                 |
|---------------------------------|----------------|----------------|----------------|-----------------|
| $F_{(000)}$                     | 687            | 607            | 689            | 609             |
| Data /restraints<br>/parameters | 5144 / 0 / 331 | 4386 / 0 / 285 | 5131 / 0 / 331 | 4373 / 12 / 295 |
| GoF                             | 1.042          | 1.061          | 1.028          | 0.994           |
| $R_1 [I > 2\sigma(I)]^a$        | 0.0293         | 0.0574         | 0.0310         | 0.0428          |
| $wR_2 [I > 2\sigma(I)]^a$       | 0.0861         | 0.1676         | 0.0981         | 0.1294          |
| $R_1$ (all data) <sup>a</sup>   | 0.0312         | 0.0619         | 0.0319         | 0.0468          |
| $wR_2$ (all data) <sup>a</sup>  | 0.0941         | 0.1717         | 0.1005         | 0.1383          |

$$^a R_1 = \sum ||F_o| - |F_c|| / \sum |F_o| ; wR_2 = \{ \sum [w(F_o^2 - F_c^2)^2] / \sum [w(F_o^2)]^2 \}^{1/2}$$

**Table S2.** Crystallographic Data and Structure Refinements for **La-1**, **La-2**, **Ce-1** and **Pr-a**.

|                                         | <b>La-1</b>                                                         | <b>La-2</b>                                                                      | <b>Ce-1</b>                                                                      | <b>Pr-a</b>                                                                      |
|-----------------------------------------|---------------------------------------------------------------------|----------------------------------------------------------------------------------|----------------------------------------------------------------------------------|----------------------------------------------------------------------------------|
| Empirical formula                       | C <sub>24</sub> H <sub>18</sub> N <sub>3</sub> O <sub>22</sub> CuLa | C <sub>32</sub> H <sub>16</sub> N <sub>4</sub> O <sub>26</sub> CuLa <sub>2</sub> | C <sub>32</sub> H <sub>24</sub> N <sub>4</sub> O <sub>30</sub> CuCe <sub>2</sub> | C <sub>32</sub> H <sub>32</sub> N <sub>4</sub> O <sub>34</sub> CuPr <sub>2</sub> |
| Formula weight                          | 902.86                                                              | 1213.85                                                                          | 1288.33                                                                          | 1361.98                                                                          |
| Crystal system                          | Triclinic                                                           | Triclinic                                                                        | Triclinic                                                                        | Triclinic                                                                        |
| Space group                             | <i>P-1</i>                                                          | <i>P-1</i>                                                                       | <i>P-1</i>                                                                       | <i>P-1</i>                                                                       |
| a (Å)                                   | 10.845(2)                                                           | 9.835(2)                                                                         | 10.236(2)                                                                        | 10.599(2)                                                                        |
| b (Å)                                   | 12.041(2)                                                           | 10.322(2)                                                                        | 10.476(2)                                                                        | 10.681(2)                                                                        |
| c (Å)                                   | 13.634(3)                                                           | 10.979(2)                                                                        | 11.089(2)                                                                        | 11.424(2)                                                                        |
| $\alpha$ (°)                            | 108.07(3)                                                           | 70.75(3)                                                                         | 75.71(3)                                                                         | 82.67(3)                                                                         |
| $\beta$ (°)                             | 108.82(3)                                                           | 84.63(3)                                                                         | 63.72(3)                                                                         | 74.14(3)                                                                         |
| $\gamma$ (°)                            | 103.88(3)                                                           | 70.97(3)                                                                         | 67.03(3)                                                                         | 69.32(3)                                                                         |
| Volume (Å <sup>3</sup> )                | 1483.5(5)                                                           | 994.7(3)                                                                         | 977.8(3)                                                                         | 1163.2(4)                                                                        |
| Z                                       | 2                                                                   | 1                                                                                | 1                                                                                | 1                                                                                |
| D <sub>Calc</sub> (mg/m <sup>-3</sup> ) | 2.021                                                               | 2.026                                                                            | 2.188                                                                            | 1.944                                                                            |
| $\mu$ (mm <sup>-1</sup> )               | 2.243                                                               | 2.743                                                                            | 2.947                                                                            | 2.626                                                                            |
| $F_{(000)}$                             | 890                                                                 | 587                                                                              | 629                                                                              | 671                                                                              |
| Data /restraints<br>/parameters         | 6724 / 0 / 463                                                      | 3570 / 0 / 295                                                                   | 4453 / 0 / 313                                                                   | 5240 / 0 / 331                                                                   |
| GoF                                     | 1.053                                                               | 1.075                                                                            | 1.023                                                                            | 1.084                                                                            |
| $R_1 [I > 2\sigma(I)]^a$                | 0.0220                                                              | 0.0773                                                                           | 0.0179                                                                           | 0.0289                                                                           |
| $wR_2 [I > 2\sigma(I)]^a$               | 0.0726                                                              | 0.1889                                                                           | 0.0662                                                                           | 0.0963                                                                           |
| $R_1$ (all data) <sup>a</sup>           | 0.0247                                                              | 0.0863                                                                           | 0.0201                                                                           | 0.0306                                                                           |
| $wR_2$ (all data) <sup>a</sup>          | 0.0777                                                              | 0.1957                                                                           | 0.0800                                                                           | 0.1022                                                                           |

$$^a R_1 = \sum ||F_o| - |F_c|| / \sum |F_o| ; wR_2 = \{ \sum [w(F_o^2 - F_c^2)^2] / \sum [w(F_o^2)]^2 \}^{1/2}$$

**Table S3** Selected bond lengths [Å] and angles [°] for **1(a,b)**-**8(a,b)**.

| <b>1a</b>           |            |                      |            |
|---------------------|------------|----------------------|------------|
| Gd(1)-O(8)          | 2.312(3)   | Gd(1)-O(10)#3        | 2.458(3)   |
| Gd(1)-O(2)          | 2.329(3)   | Gd(1)-O(9)#3         | 2.522(3)   |
| Gd(1)-O(1)#1        | 2.328(3)   | Cu(1)-O(7)#2         | 1.955(3)   |
| Gd(1)-O(13)         | 2.386(4)   | Cu(1)-O(4)#4         | 1.904(3)   |
| Gd(1)-O(14)         | 2.417(3)   | Cu(1)-O(4)           | 1.904(3)   |
| Gd(1)-O(3)#2        | 2.427(3)   | Cu(1)-O(7)#5         | 1.955(3)   |
| O(8)-Gd(1)-O(2)     | 155.05(12) | O(1)#1-Gd(1)-O(3)#2  | 137.93(11) |
| O(8)-Gd(1)-O(1)#1   | 85.17(12)  | O(13)-Gd(1)-O(3)#2   | 72.27(14)  |
| O(2)-Gd(1)-O(1)#1   | 108.23(11) | O(14)-Gd(1)-O(3)#2   | 71.37(11)  |
| O(8)-Gd(1)-O(13)    | 90.70(17)  | O(8)-Gd(1)-O(10)#3   | 129.74(11) |
| O(2)-Gd(1)-O(13)    | 88.48(16)  | O(2)-Gd(1)-O(10)#3   | 74.50(11)  |
| O(1)#1-Gd(1)-O(13)  | 147.63(14) | O(1)#1-Gd(1)-O(10)#3 | 79.03(11)  |
| O(8)-Gd(1)-O(14)    | 88.25(11)  | O(13)-Gd(1)-O(10)#3  | 79.15(14)  |
| O(2)-Gd(1)-O(14)    | 77.77(12)  | O(14)-Gd(1)-O(10)#3  | 127.63(10) |
| O(1)#1-Gd(1)-O(14)  | 68.78(11)  | O(3)#2-Gd(1)-O(10)#3 | 138.55(11) |
| O(13)-Gd(1)-O(14)   | 143.30(14) | O(8)-Gd(1)-O(9)#3    | 77.87(11)  |
| O(8)-Gd(1)-O(3)#2   | 80.66(12)  | O(2)-Gd(1)-O(9)#3    | 124.89(11) |
| O(2)-Gd(1)-O(3)#2   | 75.35(11)  | O(1)#1-Gd(1)-O(9)#3  | 77.38(12)  |
| O(14)-Gd(1)-O(9)#3  | 144.36(11) | O(13)-Gd(1)-O(9)#3   | 70.38(15)  |
| O(3)#2-Gd(1)-O(9)#3 | 136.25(11) | O(10)#3-Gd(1)-O(9)#3 | 52.24(10)  |
| O(4)#4-Cu(1)-O(4)   | 180.000(1) | O(4)-Cu(1)-O(7)#2    | 89.12(13)  |
| O(4)#4-Cu(1)-O(7)#5 | 89.12(13)  | O(7)#5-Cu(1)-O(7)#2  | 180.000(1) |
| O(4)-Cu(1)-O(7)#5   | 90.88(13)  | O(4)#4-Cu(1)-O(7)#2  | 90.88(13)  |
| <b>1b</b>           |            |                      |            |
| Gd(1)-O(8)#1        | 2.351(7)   | Gd(1)-O(3)#4         | 2.572(7)   |
| Gd(1)-O(7)          | 2.378(8)   | Gd(1)-O(1)           | 2.560(8)   |
| Gd(1)-O(9)#2        | 2.389(8)   | Cu(1)-O(4)#9         | 2.545(8)   |
| Gd(1)-O(3)#3        | 2.395(8)   | Cu(1)-O(10)#5        | 1.886(8)   |
| Gd(1)-O(13)         | 2.411(8)   | Cu(1)-O(10)          | 1.886(8)   |
| Gd(1)-O(2)          | 2.503(8)   | Cu(1)-O(1)#6         | 1.991(8)   |
| Gd(1)-O(4)#4        | 2.516(8)   | Cu(1)-O(1)#7         | 1.991(8)   |
| Cu(1)-O(4)#8        | 2.545(8)   | O(9)#2-Gd(1)-O(4)#4  | 77.9(3)    |
| O(8)#1-Gd(1)-O(7)   | 136.8(3)   | O(3)#3-Gd(1)-O(4)#4  | 122.1(2)   |
| O(8)#1-Gd(1)-O(9)#2 | 76.6(3)    | O(13)-Gd(1)-O(4)#4   | 155.7(3)   |
| O(7)-Gd(1)-O(9)#2   | 140.3(3)   | O(2)-Gd(1)-O(4)#4    | 117.6(3)   |
| O(8)#1-Gd(1)-O(3)#3 | 77.0(3)    | O(8)#1-Gd(1)-O(1)    | 147.1(3)   |
| O(7)-Gd(1)-O(3)#3   | 70.5(3)    | O(7)-Gd(1)-O(1)      | 71.6(3)    |
| O(9)#2-Gd(1)-O(3)#3 | 149.1(3)   | O(9)#2-Gd(1)-O(1)    | 71.2(3)    |
| O(8)#1-Gd(1)-O(13)  | 71.9(3)    | O(3)#3-Gd(1)-O(1)    | 135.7(3)   |

|                      |            |                      |            |
|----------------------|------------|----------------------|------------|
| O(7)-Gd(1)-O(13)     | 126.1(3)   | O(13)-Gd(1)-O(1)     | 106.8(3)   |
| O(9)#2-Gd(1)-O(13)   | 78.1(3)    | O(2)-Gd(1)-O(1)      | 51.4(3)    |
| O(3)#3-Gd(1)-O(13)   | 78.7(3)    | O(4)#4-Gd(1)-O(1)    | 68.4(3)    |
| O(8)#1-Gd(1)-O(2)    | 140.2(3)   | O(8)#1-Gd(1)-O(3)#4  | 72.5(3)    |
| O(7)-Gd(1)-O(2)      | 71.4(3)    | O(7)-Gd(1)-O(3)#4    | 71.9(3)    |
| O(9)#2-Gd(1)-O(2)    | 95.3(3)    | O(9)#2-Gd(1)-O(3)#4  | 112.2(3)   |
| O(3)#3-Gd(1)-O(2)    | 94.7(3)    | O(3)#3-Gd(1)-O(3)#4  | 74.2(3)    |
| O(13)-Gd(1)-O(2)     | 68.3(3)    | O(13)-Gd(1)-O(3)#4   | 139.0(3)   |
| O(8)#1-Gd(1)-O(4)#4  | 99.0(3)    | O(2)-Gd(1)-O(3)#4    | 143.2(3)   |
| O(7)-Gd(1)-O(4)#4    | 76.1(3)    | O(10)#5-Cu(1)-O(10)  | 180.000(2) |
| O(4)#4-Gd(1)-O(3)#4  | 50.7(2)    | O(10)#5-Cu(1)-O(1)#6 | 89.7(4)    |
| O(1)-Gd(1)-O(3)#4    | 114.1(3)   | O(10)-Cu(1)-O(1)#6   | 90.3(4)    |
| O(1)#6-Cu(1)-O(1)#7  | 180.0(5)   | O(10)#5-Cu(1)-O(1)#7 | 90.3(4)    |
| O(10)#5-Cu(1)-O(4)#8 | 87.4(3)    | O(10)-Cu(1)-O(1)#7   | 89.7(4)    |
| O(10)-Cu(1)-O(4)#8   | 92.6(3)    | O(10)#5-Cu(1)-O(4)#9 | 92.6(3)    |
| O(1)#6-Cu(1)-O(4)#8  | 76.9(3)    | O(10)-Cu(1)-O(4)#9   | 87.4(3)    |
| O(1)#7-Cu(1)-O(4)#8  | 103.1(3)   | O(1)#6-Cu(1)-O(4)#9  | 103.1(3)   |
| O(4)#8-Cu(1)-O(4)#9  | 180.000(1) | O(1)#7-Cu(1)-O(4)#9  | 76.9(3)    |

## 2a

|                     |            |                      |            |
|---------------------|------------|----------------------|------------|
| Nd(1)-O(8)          | 2.363(3)   | Nd(1)-O(3)#2         | 2.473(3)   |
| Nd(1)-O(2)          | 2.377(3)   | Nd(1)-O(10)#3        | 2.492(3)   |
| Nd(1)-O(1)#1        | 2.388(3)   | Nd(1)-O(9)#3         | 2.575(3)   |
| Nd(1)-O(13)         | 2.454(4)   | Nd(1)-O(14)          | 2.463(3)   |
| Cu(1)-O(4)#4        | 1.909(3)   | Cu(1)-O(7)#2         | 1.956(3)   |
| Cu(1)-O(4)          | 1.909(3)   | Cu(1)-O(7)#5         | 1.956(3)   |
| O(8)-Nd(1)-O(2)     | 155.05(12) | O(1)#1-Nd(1)-O(10)#3 | 78.92(11)  |
| O(8)-Nd(1)-O(1)#1   | 85.06(12)  | O(13)-Nd(1)-O(10)#3  | 79.14(15)  |
| O(2)-Nd(1)-O(1)#1   | 108.43(11) | O(14)-Nd(1)-O(10)#3  | 127.10(10) |
| O(8)-Nd(1)-O(13)    | 90.61(17)  | O(3)#2-Nd(1)-O(10)#3 | 139.98(10) |
| O(2)-Nd(1)-O(13)    | 88.49(16)  | O(8)-Nd(1)-O(9)#3    | 78.30(11)  |
| O(1)#1-Nd(1)-O(13)  | 147.53(14) | O(2)-Nd(1)-O(9)#3    | 124.37(11) |
| O(8)-Nd(1)-O(14)    | 89.11(12)  | O(1)#1-Nd(1)-O(9)#3  | 77.68(12)  |
| O(2)-Nd(1)-O(14)    | 77.10(12)  | O(13)-Nd(1)-O(9)#3   | 69.94(15)  |
| O(1)#1-Nd(1)-O(14)  | 68.71(11)  | O(14)-Nd(1)-O(9)#3   | 145.00(11) |
| O(13)-Nd(1)-O(14)   | 143.52(14) | O(3)#2-Nd(1)-O(9)#3  | 136.02(11) |
| O(8)-Nd(1)-O(3)#2   | 79.58(11)  | O(10)#3-Nd(1)-O(9)#3 | 51.40(10)  |
| O(2)-Nd(1)-O(3)#2   | 76.34(11)  | O(4)#4-Cu(1)-O(4)    | 180.000(1) |
| O(1)#1-Nd(1)-O(3)#2 | 137.16(11) | O(4)#4-Cu(1)-O(7)#2  | 91.05(13)  |
| O(13)-Nd(1)-O(3)#2  | 72.81(14)  | O(4)-Cu(1)-O(7)#2    | 88.95(13)  |
| O(14)-Nd(1)-O(3)#2  | 71.28(11)  | O(4)#4-Cu(1)-O(7)#5  | 88.95(13)  |
| O(8)-Nd(1)-O(10)#3  | 129.28(10) | O(4)-Cu(1)-O(7)#5    | 91.05(13)  |
| O(2)-Nd(1)-O(10)#3  | 74.94(11)  | O(7)#2-Cu(1)-O(7)#5  | 180.000(1) |

## 2b

|              |          |              |          |
|--------------|----------|--------------|----------|
| Nd(1)-O(8)#1 | 2.405(8) | Nd(1)-O(3)#4 | 2.601(9) |
|--------------|----------|--------------|----------|

|                     |            |                      |            |
|---------------------|------------|----------------------|------------|
| Nd(1)-O(9)#2        | 2.445(8)   | Nd(1)-O(1)           | 2.622(8)   |
| Nd(1)-O(7)          | 2.446(9)   | Cu(1)-O(10)          | 1.887(8)   |
| Nd(1)-O(3)#3        | 2.457(8)   | Cu(1)-O(10)#5        | 1.887(8)   |
| Nd(1)-O(13)         | 2.475(10)  | Cu(1)-O(1)#6         | 2.001(8)   |
| Nd(1)-O(2)          | 2.502(9)   | Cu(1)-O(1)#7         | 2.001(8)   |
| Nd(1)-O(4)#4        | 2.574(9)   | Cu(1)-O(4)#8         | 2.562(9)   |
| Cu(1)-O(4)#9        | 2.562(9)   | O(3)#3-Nd(1)-O(1)    | 135.4(3)   |
| O(8)#1-Nd(1)-O(9)#2 | 77.5(3)    | O(13)-Nd(1)-O(1)     | 107.7(3)   |
| O(8)#1-Nd(1)-O(7)   | 136.0(3)   | O(2)-Nd(1)-O(1)      | 50.4(3)    |
| O(9)#2-Nd(1)-O(7)   | 140.6(3)   | O(4)#4-Nd(1)-O(1)    | 67.2(3)    |
| O(8)#1-Nd(1)-O(3)#3 | 76.2(3)    | O(3)#4-Nd(1)-O(1)    | 113.0(2)   |
| O(9)#2-Nd(1)-O(3)#3 | 149.7(3)   | O(10)-Cu(1)-O(10)#5  | 180.000(2) |
| O(7)-Nd(1)-O(3)#3   | 69.6(3)    | O(10)-Cu(1)-O(1)#6   | 91.1(4)    |
| O(8)#1-Nd(1)-O(13)  | 71.7(3)    | O(10)#5-Cu(1)-O(1)#6 | 88.9(4)    |
| O(9)#2-Nd(1)-O(13)  | 79.3(3)    | O(10)-Cu(1)-O(1)#7   | 88.9(4)    |
| O(7)-Nd(1)-O(13)    | 124.8(3)   | O(10)#5-Cu(1)-O(1)#7 | 91.1(4)    |
| O(3)#3-Nd(1)-O(13)  | 78.5(3)    | O(1)#6-Cu(1)-O(1)#7  | 180.000(2) |
| O(8)#1-Nd(1)-O(2)   | 140.8(3)   | O(10)-Cu(1)-O(4)#8   | 95.1(4)    |
| O(9)#2-Nd(1)-O(2)   | 94.9(3)    | O(10)#5-Cu(1)-O(4)#8 | 84.9(4)    |
| O(7)-Nd(1)-O(2)     | 71.0(3)    | O(1)#6-Cu(1)-O(4)#8  | 77.0(3)    |
| O(3)#3-Nd(1)-O(2)   | 96.1(3)    | O(1)#7-Cu(1)-O(4)#8  | 103.0(3)   |
| O(13)-Nd(1)-O(2)    | 69.1(3)    | O(10)-Cu(1)-O(4)#9   | 84.9(4)    |
| O(8)#1-Nd(1)-O(4)#4 | 100.7(3)   | O(10)#5-Cu(1)-O(4)#9 | 95.1(4)    |
| O(9)#2-Nd(1)-O(4)#4 | 78.1(3)    | O(1)#6-Cu(1)-O(4)#9  | 103.0(3)   |
| O(7)-Nd(1)-O(4)#4   | 75.7(3)    | O(1)#7-Cu(1)-O(4)#9  | 77.0(3)    |
| O(3)#3-Nd(1)-O(4)#4 | 121.4(3)   | O(4)#8-Cu(1)-O(4)#9  | 180.000(1) |
| O(13)-Nd(1)-O(4)#4  | 157.3(3)   | O(2)-Nd(1)-O(3)#4    | 142.7(3)   |
| O(2)-Nd(1)-O(4)#4   | 115.4(3)   | O(4)#4-Nd(1)-O(3)#4  | 50.4(3)    |
| O(8)#1-Nd(1)-O(3)#4 | 72.8(3)    | O(8)#1-Nd(1)-O(1)    | 148.3(3)   |
| O(9)#2-Nd(1)-O(3)#4 | 111.7(3)   | O(9)#2-Nd(1)-O(1)    | 71.5(3)    |
| O(7)-Nd(1)-O(3)#4   | 71.9(3)    | O(7)-Nd(1)-O(1)      | 71.5(3)    |
| O(3)#3-Nd(1)-O(3)#4 | 74.1(3)    | O(13)-Nd(1)-O(3)#4   | 139.3(3)   |
| <b>3a</b>           |            |                      |            |
| Sm(1)-O(8)          | 2.323(4)   | Sm(1)-O(10)#3        | 2.479(4)   |
| Sm(1)-O(2)          | 2.350(4)   | Sm(1)-O(9)#3         | 2.560(4)   |
| Sm(1)-O(1)#1        | 2.353(4)   | Cu(1)-O(4)           | 1.906(3)   |
| Sm(1)-O(13)         | 2.417(5)   | Cu(1)-O(4)#4         | 1.906(3)   |
| Sm(1)-O(14)         | 2.435(4)   | Cu(1)-O(7)#5         | 1.954(3)   |
| Sm(1)-O(3)#2        | 2.456(4)   | Cu(1)-O(7)#2         | 1.954(3)   |
| O(8)-Sm(1)-O(2)     | 154.85(15) | O(2)-Sm(1)-O(10)#3   | 74.42(13)  |
| O(8)-Sm(1)-O(1)#1   | 84.94(15)  | O(1)#1-Sm(1)-O(10)#3 | 79.36(13)  |
| O(2)-Sm(1)-O(1)#1   | 108.44(14) | O(13)-Sm(1)-O(10)#3  | 79.37(18)  |
| O(8)-Sm(1)-O(13)    | 89.2(2)    | O(14)-Sm(1)-O(10)#3  | 127.77(13) |
| O(2)-Sm(1)-O(13)    | 90.3(2)    | O(3)#2-Sm(1)-O(10)#3 | 138.61(13) |

|                     |            |                      |            |
|---------------------|------------|----------------------|------------|
| O(1)#1-Sm(1)-O(13)  | 146.48(18) | O(8)-Sm(1)-O(9)#3    | 78.49(13)  |
| O(8)-Sm(1)-O(14)    | 88.12(14)  | O(2)-Sm(1)-O(9)#3    | 124.50(13) |
| O(2)-Sm(1)-O(14)    | 77.61(14)  | O(1)#1-Sm(1)-O(9)#3  | 77.44(14)  |
| O(1)#1-Sm(1)-O(14)  | 68.97(14)  | O(13)-Sm(1)-O(9)#3   | 69.05(18)  |
| O(13)-Sm(1)-O(14)   | 143.90(17) | O(14)-Sm(1)-O(9)#3   | 144.79(14) |
| O(8)-Sm(1)-O(3)#2   | 80.33(14)  | O(3)#2-Sm(1)-O(9)#3  | 136.39(14) |
| O(2)-Sm(1)-O(3)#2   | 75.51(14)  | O(10)#3-Sm(1)-O(9)#3 | 51.91(12)  |
| O(1)#1-Sm(1)-O(3)#2 | 137.66(14) | O(4)-Cu(1)-O(4)#4    | 180.000(1) |
| O(13)-Sm(1)-O(3)#2  | 73.01(17)  | O(4)-Cu(1)-O(7)#5    | 90.81(16)  |
| O(14)-Sm(1)-O(3)#2  | 71.06(14)  | O(8)-Sm(1)-O(10)#3   | 130.03(13) |
| O(4)#4-Cu(1)-O(7)#5 | 89.19(16)  | O(4)#4-Cu(1)-O(7)#2  | 90.81(16)  |
| O(4)-Cu(1)-O(7)#2   | 89.19(16)  | O(7)#5-Cu(1)-O(7)#2  | 180.00(6)  |

### 3b

|                      |          |                      |            |
|----------------------|----------|----------------------|------------|
| Sm(1)-O(8)#1         | 2.388(6) | Sm(1)-O(3)#4         | 2.592(6)   |
| Sm(1)-O(7)           | 2.399(6) | Cu(1)-O(10)#5        | 1.888(7)   |
| Sm(1)-O(3)#2         | 2.411(6) | Cu(1)-O(10)          | 1.888(7)   |
| Sm(1)-O(9)#3         | 2.426(7) | Cu(1)-O(1)#6         | 2.000(6)   |
| Sm(1)-O(13)          | 2.447(7) | Cu(1)-O(1)#7         | 2.000(6)   |
| Sm(1)-O(2)           | 2.485(6) | Cu(1)-O(4)#8         | 2.537(6)   |
| Sm(1)-O(4)#4         | 2.538(6) | Cu(1)-O(4)#9         | 2.537(6)   |
| Sm(1)-O(1)           | 2.580(6) | O(8)#1-Sm(1)-O(7)    | 136.6(2)   |
| O(8)#1-Sm(1)-O(3)#2  | 76.3(2)  | O(3)#2-Sm(1)-O(4)#4  | 122.1(2)   |
| O(7)-Sm(1)-O(3)#2    | 70.4(2)  | O(9)#3-Sm(1)-O(4)#4  | 77.9(2)    |
| O(8)#1-Sm(1)-O(9)#3  | 77.1(2)  | O(13)-Sm(1)-O(4)#4   | 156.2(3)   |
| O(7)-Sm(1)-O(9)#3    | 140.4(2) | O(2)-Sm(1)-O(4)#4    | 116.3(2)   |
| O(3)#2-Sm(1)-O(9)#3  | 149.2(2) | O(8)#1-Sm(1)-O(1)    | 147.8(2)   |
| O(8)#1-Sm(1)-O(13)   | 71.8(2)  | O(7)-Sm(1)-O(1)      | 71.5(2)    |
| O(7)-Sm(1)-O(13)     | 125.6(3) | O(3)#2-Sm(1)-O(1)    | 135.7(2)   |
| O(3)#2-Sm(1)-O(13)   | 78.6(2)  | O(9)#3-Sm(1)-O(1)    | 71.3(2)    |
| O(9)#3-Sm(1)-O(13)   | 78.5(2)  | O(13)-Sm(1)-O(1)     | 106.8(2)   |
| O(8)#1-Sm(1)-O(2)    | 140.3(2) | O(2)-Sm(1)-O(1)      | 50.64(19)  |
| O(7)-Sm(1)-O(2)      | 71.3(2)  | O(4)#4-Sm(1)-O(1)    | 67.80(19)  |
| O(3)#2-Sm(1)-O(2)    | 95.6(2)  | O(8)#1-Sm(1)-O(3)#4  | 72.9(2)    |
| O(9)#3-Sm(1)-O(2)    | 95.0(3)  | O(7)-Sm(1)-O(3)#4    | 71.6(2)    |
| O(13)-Sm(1)-O(2)     | 68.5(2)  | O(3)#2-Sm(1)-O(3)#4  | 74.0(2)    |
| O(8)#1-Sm(1)-O(4)#4  | 100.1(2) | O(9)#3-Sm(1)-O(3)#4  | 112.2(2)   |
| O(7)-Sm(1)-O(4)#4    | 75.9(2)  | O(13)-Sm(1)-O(3)#4   | 139.4(2)   |
| O(10)#5-Cu(1)-O(4)#8 | 93.8(3)  | O(2)-Sm(1)-O(3)#4    | 142.9(2)   |
| O(10)-Cu(1)-O(4)#8   | 86.2(3)  | O(4)#4-Sm(1)-O(3)#4  | 50.92(19)  |
| O(1)#6-Cu(1)-O(4)#8  | 103.0(2) | O(1)-Sm(1)-O(3)#4    | 113.77(19) |
| O(1)#7-Cu(1)-O(4)#8  | 77.0(2)  | O(10)#5-Cu(1)-O(10)  | 180.000(2) |
| O(10)#5-Cu(1)-O(4)#9 | 86.2(3)  | O(10)#5-Cu(1)-O(1)#6 | 89.6(3)    |
| O(10)-Cu(1)-O(4)#9   | 93.8(3)  | O(10)-Cu(1)-O(1)#6   | 90.4(3)    |
| O(1)#6-Cu(1)-O(4)#9  | 77.0(2)  | O(10)#5-Cu(1)-O(1)#7 | 90.4(3)    |



|                     |            |                     |            |
|---------------------|------------|---------------------|------------|
| O(1)#7-Cu(1)-O(4)#9 | 103.0(2)   | O(10)-Cu(1)-O(1)#7  | 89.6(3)    |
| O(4)#8-Cu(1)-O(4)#9 | 180.000(1) | O(1)#6-Cu(1)-O(1)#7 | 180.000(2) |

#### 4a

|                     |            |                      |            |
|---------------------|------------|----------------------|------------|
| Eu(1)-O(8)          | 2.321(3)   | Eu(1)-O(10)#3        | 2.462(3)   |
| Eu(1)-O(2)          | 2.336(3)   | Eu(1)-O(9)#3         | 2.535(4)   |
| Eu(1)-O(1)#1        | 2.350(3)   | Cu(1)-O(4)#4         | 1.912(3)   |
| Eu(1)-O(13)         | 2.399(4)   | Cu(1)-O(4)           | 1.912(3)   |
| Eu(1)-O(14)         | 2.429(3)   | Cu(1)-O(7)#5         | 1.954(3)   |
| Eu(1)-O(3)#2        | 2.441(3)   | Cu(1)-O(7)#2         | 1.954(3)   |
| O(8)-Eu(1)-O(2)     | 155.04(12) | O(3)#2-Eu(1)-O(10)#3 | 138.97(12) |
| O(8)-Eu(1)-O(1)#1   | 85.32(13)  | O(8)-Eu(1)-O(9)#3    | 78.00(11)  |
| O(2)-Eu(1)-O(1)#1   | 108.02(12) | O(2)-Eu(1)-O(9)#3    | 124.78(12) |
| O(8)-Eu(1)-O(13)    | 90.60(19)  | O(1)#1-Eu(1)-O(9)#3  | 77.56(13)  |
| O(2)-Eu(1)-O(13)    | 88.65(18)  | O(13)-Eu(1)-O(9)#3   | 70.22(17)  |
| O(1)#1-Eu(1)-O(13)  | 147.67(16) | O(14)-Eu(1)-O(9)#3   | 144.62(13) |
| O(8)-Eu(1)-O(14)    | 88.52(13)  | O(3)#2-Eu(1)-O(9)#3  | 136.28(13) |
| O(2)-Eu(1)-O(14)    | 77.45(13)  | O(10)#3-Eu(1)-O(9)#3 | 52.01(11)  |
| O(1)#1-Eu(1)-O(14)  | 68.76(12)  | O(4)#4-Cu(1)-O(4)    | 180.000(1) |
| O(13)-Eu(1)-O(14)   | 143.31(16) | O(4)#4-Cu(1)-O(7)#5  | 89.03(14)  |
| O(8)-Eu(1)-O(3)#2   | 80.36(12)  | O(4)-Cu(1)-O(7)#5    | 90.97(14)  |
| O(2)-Eu(1)-O(3)#2   | 75.63(12)  | O(4)#4-Cu(1)-O(7)#2  | 90.97(14)  |
| O(1)#1-Eu(1)-O(3)#2 | 137.63(12) | O(4)-Cu(1)-O(7)#2    | 89.03(14)  |
| O(13)-Eu(1)-O(3)#2  | 72.51(16)  | O(7)#5-Cu(1)-O(7)#2  | 180.000(1) |
| O(14)-Eu(1)-O(3)#2  | 71.19(12)  | O(13)-Eu(1)-O(10)#3  | 79.17(16)  |
| O(8)-Eu(1)-O(10)#3  | 129.63(11) | O(14)-Eu(1)-O(10)#3  | 127.51(11) |
| O(2)-Eu(1)-O(10)#3  | 74.63(12)  | O(1)#1-Eu(1)-O(10)#3 | 78.96(12)  |

#### 4b

|                     |          |                      |            |
|---------------------|----------|----------------------|------------|
| Eu(1)-O(3)#1        | 2.374(8) | Eu(1)-O(3)#4         | 2.601(8)   |
| Eu(1)-O(8)#2        | 2.379(7) | Cu(1)-O(10)#5        | 1.910(9)   |
| Eu(1)-O(9)#3        | 2.386(8) | Cu(1)-O(10)          | 1.910(9)   |
| Eu(1)-O(7)          | 2.407(7) | Cu(1)-O(1)#6         | 2.002(7)   |
| Eu(1)-O(2)          | 2.476(8) | Cu(1)-O(1)#7         | 2.002(7)   |
| Eu(1)-O(13)         | 2.488(9) | Cu(1)-O(4)#8         | 2.514(8)   |
| Eu(1)-O(1)          | 2.556(7) | Cu(1)-O(4)#9         | 2.514(8)   |
| Eu(1)-O(4)#4        | 2.560(8) | O(3)#1-Eu(1)-O(8)#2  | 77.1(3)    |
| O(3)#1-Eu(1)-O(9)#3 | 148.6(3) | O(4)#4-Eu(1)-O(3)#4  | 49.9(2)    |
| O(8)#2-Eu(1)-O(9)#3 | 75.8(3)  | O(10)#5-Cu(1)-O(10)  | 180.000(1) |
| O(3)#1-Eu(1)-O(7)   | 70.9(3)  | O(10)#5-Cu(1)-O(1)#6 | 88.5(4)    |
| O(8)#2-Eu(1)-O(7)   | 137.2(3) | O(10)-Cu(1)-O(1)#6   | 91.5(4)    |
| O(9)#3-Eu(1)-O(7)   | 140.5(3) | O(10)#5-Cu(1)-O(1)#7 | 91.5(4)    |
| O(3)#1-Eu(1)-O(2)   | 94.6(3)  | O(10)-Cu(1)-O(1)#7   | 88.5(4)    |
| O(8)#2-Eu(1)-O(2)   | 139.7(3) | O(1)#6-Cu(1)-O(1)#7  | 180.000(1) |
| O(9)#3-Eu(1)-O(2)   | 95.8(3)  | O(10)#5-Cu(1)-O(4)#8 | 87.0(3)    |
| O(7)-Eu(1)-O(2)     | 71.7(3)  | O(10)-Cu(1)-O(4)#8   | 93.0(3)    |

|                     |          |                      |            |
|---------------------|----------|----------------------|------------|
| O(3)#1-Eu(1)-O(13)  | 79.2(3)  | O(1)#6-Cu(1)-O(4)#8  | 102.6(3)   |
| O(8)#2-Eu(1)-O(13)  | 71.1(3)  | O(1)#7-Cu(1)-O(4)#8  | 77.4(3)    |
| O(9)#3-Eu(1)-O(13)  | 77.3(3)  | O(10)#5-Cu(1)-O(4)#9 | 93.0(3)    |
| O(7)-Eu(1)-O(13)    | 127.3(3) | O(10)-Cu(1)-O(4)#9   | 87.0(3)    |
| O(2)-Eu(1)-O(13)    | 68.6(3)  | O(1)#6-Cu(1)-O(4)#9  | 77.4(3)    |
| O(3)#1-Eu(1)-O(1)   | 135.2(3) | O(1)#7-Cu(1)-O(4)#9  | 102.6(3)   |
| O(8)#2-Eu(1)-O(1)   | 147.5(3) | O(4)#8-Cu(1)-O(4)#9  | 180.000(1) |
| O(9)#3-Eu(1)-O(1)   | 72.3(3)  | O(3)#1-Eu(1)-O(3)#4  | 74.8(3)    |
| O(7)-Eu(1)-O(1)     | 70.9(3)  | O(8)#2-Eu(1)-O(3)#4  | 73.8(3)    |
| O(2)-Eu(1)-O(1)     | 51.4(2)  | O(9)#3-Eu(1)-O(3)#4  | 112.0(3)   |
| O(13)-Eu(1)-O(1)    | 107.0(3) | O(7)-Eu(1)-O(3)#4    | 71.0(3)    |
| O(3)#1-Eu(1)-O(4)#4 | 121.6(3) | O(2)-Eu(1)-O(3)#4    | 142.6(3)   |
| O(8)#2-Eu(1)-O(4)#4 | 100.5(3) | O(2)-Eu(1)-O(4)#4    | 116.8(3)   |
| O(9)#3-Eu(1)-O(4)#4 | 79.1(3)  | O(13)-Eu(1)-O(4)#4   | 156.2(3)   |
| O(7)-Eu(1)-O(4)#4   | 74.3(3)  | O(1)-Eu(1)-O(3)#4    | 113.0(2)   |
| O(13)-Eu(1)-O(3)#4  | 139.9(3) | O(1)-Eu(1)-O(4)#4    | 67.8(2)    |

### 5a

|                     |            |                      |            |
|---------------------|------------|----------------------|------------|
| Tb(1)-O(8)          | 2.280(3)   | Tb(1)-O(9)#3         | 2.523(3)   |
| Tb(1)-O(2)          | 2.313(3)   | Cu(1)-O(4)           | 1.908(3)   |
| Tb(1)-O(1)#1        | 2.318(3)   | Cu(1)-O(4)#4         | 1.908(3)   |
| Tb(1)-O(13)         | 2.371(4)   | Cu(1)-O(7)#2         | 1.953(3)   |
| Tb(1)-O(14)         | 2.394(3)   | Cu(1)-O(7)#5         | 1.953(3)   |
| Tb(1)-O(3)#2        | 2.420(3)   | Tb(1)-O(10)#3        | 2.441(3)   |
| O(8)-Tb(1)-O(2)     | 154.75(12) | O(1)#1-Tb(1)-O(10)#3 | 79.00(11)  |
| O(8)-Tb(1)-O(1)#1   | 85.54(12)  | O(13)-Tb(1)-O(10)#3  | 79.36(15)  |
| O(2)-Tb(1)-O(1)#1   | 108.13(11) | O(14)-Tb(1)-O(10)#3  | 127.96(11) |
| O(8)-Tb(1)-O(13)    | 89.20(17)  | O(3)#2-Tb(1)-O(10)#3 | 137.96(11) |
| O(2)-Tb(1)-O(13)    | 90.13(17)  | O(8)-Tb(1)-O(9)#3    | 77.98(11)  |
| O(1)#1-Tb(1)-O(13)  | 146.51(15) | O(2)-Tb(1)-O(9)#3    | 125.07(11) |
| O(8)-Tb(1)-O(14)    | 87.88(12)  | O(1)#1-Tb(1)-O(9)#3  | 77.06(12)  |
| O(2)-Tb(1)-O(14)    | 77.94(12)  | O(13)-Tb(1)-O(9)#3   | 69.50(15)  |
| O(1)#1-Tb(1)-O(14)  | 69.06(11)  | O(14)-Tb(1)-O(9)#3   | 144.16(11) |
| O(13)-Tb(1)-O(14)   | 143.84(14) | O(3)#2-Tb(1)-O(9)#3  | 136.49(12) |
| O(8)-Tb(1)-O(3)#2   | 80.77(12)  | O(10)#3-Tb(1)-O(9)#3 | 52.48(10)  |
| O(2)-Tb(1)-O(3)#2   | 74.95(11)  | O(4)-Cu(1)-O(4)#4    | 180.000(1) |
| O(1)#1-Tb(1)-O(3)#2 | 138.33(12) | O(4)-Cu(1)-O(7)#2    | 89.26(14)  |
| O(13)-Tb(1)-O(3)#2  | 72.70(15)  | O(4)#4-Cu(1)-O(7)#2  | 90.74(14)  |
| O(14)-Tb(1)-O(3)#2  | 71.26(12)  | O(4)-Cu(1)-O(7)#5    | 90.74(14)  |
| O(8)-Tb(1)-O(10)#3  | 130.15(11) | O(4)#4-Cu(1)-O(7)#5  | 89.26(14)  |
| O(2)-Tb(1)-O(10)#3  | 74.34(11)  | O(7)#2-Cu(1)-O(7)#5  | 180.000(1) |

### 5b

|              |          |               |          |
|--------------|----------|---------------|----------|
| Tb(1)-O(8)#1 | 2.342(5) | Tb(1)-O(1)    | 2.542(5) |
| Tb(1)-O(7)   | 2.358(5) | Tb(1)-O(3)#4  | 2.550(5) |
| Tb(1)-O(9)#2 | 2.373(5) | Cu(1)-O(10)#5 | 1.882(5) |

|                      |            |                      |            |
|----------------------|------------|----------------------|------------|
| Tb(1)-O(3)#3         | 2.377(5)   | Cu(1)-O(10)          | 1.882(5)   |
| Tb(1)-O(13)          | 2.393(6)   | Cu(1)-O(1)#6         | 2.003(5)   |
| Tb(1)-O(2)           | 2.454(6)   | Cu(1)-O(1)#7         | 2.003(5)   |
| Tb(1)-O(4)#4         | 2.500(6)   | Cu(1)-O(4)#8         | 2.534(5)   |
| Cu(1)-O(4)#9         | 2.534(5)   | O(8)#1-Tb(1)-O(7)    | 136.90(18) |
| O(8)#1-Tb(1)-O(9)#2  | 75.94(19)  | O(13)-Tb(1)-O(4)#4   | 155.3(2)   |
| O(7)-Tb(1)-O(9)#2    | 140.43(19) | O(2)-Tb(1)-O(4)#4    | 117.61(18) |
| O(8)#1-Tb(1)-O(3)#3  | 77.41(18)  | O(8)#1-Tb(1)-O(1)    | 147.03(18) |
| O(7)-Tb(1)-O(3)#3    | 70.44(18)  | O(7)-Tb(1)-O(1)      | 71.56(18)  |
| O(9)#2-Tb(1)-O(3)#3  | 149.10(18) | O(9)#2-Tb(1)-O(1)    | 71.65(18)  |
| O(8)#1-Tb(1)-O(13)   | 72.2(2)    | O(3)#3-Tb(1)-O(1)    | 135.39(17) |
| O(7)-Tb(1)-O(13)     | 126.9(2)   | O(13)-Tb(1)-O(1)     | 105.8(2)   |
| O(9)#2-Tb(1)-O(13)   | 77.4(2)    | O(2)-Tb(1)-O(1)      | 51.37(17)  |
| O(3)#3-Tb(1)-O(13)   | 79.8(2)    | O(4)#4-Tb(1)-O(1)    | 68.87(17)  |
| O(8)#1-Tb(1)-O(2)    | 140.8(2)   | O(8)#1-Tb(1)-O(3)#4  | 71.90(18)  |
| O(7)-Tb(1)-O(2)      | 70.7(2)    | O(7)-Tb(1)-O(3)#4    | 72.01(18)  |
| O(9)#2-Tb(1)-O(2)    | 96.8(2)    | O(9)#2-Tb(1)-O(3)#4  | 111.93(19) |
| O(3)#3-Tb(1)-O(2)    | 93.99(18)  | O(3)#3-Tb(1)-O(3)#4  | 73.62(19)  |
| O(13)-Tb(1)-O(2)     | 68.6(2)    | O(13)-Tb(1)-O(3)#4   | 138.99(18) |
| O(8)#1-Tb(1)-O(4)#4  | 98.8(2)    | O(2)-Tb(1)-O(3)#4    | 142.72(19) |
| O(7)-Tb(1)-O(4)#4    | 75.6(2)    | O(4)#4-Tb(1)-O(3)#4  | 51.00(17)  |
| O(9)#2-Tb(1)-O(4)#4  | 78.1(2)    | O(1)-Tb(1)-O(3)#4    | 115.06(17) |
| O(3)#3-Tb(1)-O(4)#4  | 121.55(17) | O(10)#5-Cu(1)-O(10)  | 180.000(2) |
| O(10)-Cu(1)-O(1)#6   | 89.7(2)    | O(10)#5-Cu(1)-O(1)#6 | 90.3(2)    |
| O(10)#5-Cu(1)-O(1)#7 | 89.7(2)    | O(10)-Cu(1)-O(4)#9   | 92.2(2)    |
| O(10)-Cu(1)-O(1)#7   | 90.3(2)    | O(1)#6-Cu(1)-O(4)#9  | 103.1(2)   |
| O(1)#6-Cu(1)-O(1)#7  | 180.000(1) | O(1)#7-Cu(1)-O(4)#9  | 76.9(2)    |
| O(10)#5-Cu(1)-O(4)#8 | 92.2(2)    | O(4)#8-Cu(1)-O(4)#9  | 180.000(1) |
| O(10)-Cu(1)-O(4)#8   | 87.8(2)    | O(10)#5-Cu(1)-O(4)#9 | 87.8(2)    |
| O(1)#6-Cu(1)-O(4)#8  | 76.9(2)    | O(1)#7-Cu(1)-O(4)#8  | 103.1(2)   |
| <b>6a</b>            |            |                      |            |
| Dy(1)-O(8)           | 2.266(3)   | Dy(1)-O(10)#3        | 2.437(3)   |
| Dy(1)-O(1)#1         | 2.298(3)   | Dy(1)-O(9)#3         | 2.506(3)   |
| Dy(1)-O(2)           | 2.298(3)   | Cu(1)-O(4)           | 1.905(3)   |
| Dy(1)-O(13)          | 2.359(4)   | Cu(1)-O(4)#4         | 1.905(3)   |
| Dy(1)-O(14)          | 2.393(3)   | Cu(1)-O(7)#2         | 1.954(3)   |
| Dy(1)-O(3)#2         | 2.413(3)   | Cu(1)-O(7)#5         | 1.954(3)   |
| O(8)-Dy(1)-O(1)#1    | 85.57(12)  | O(3)#2-Dy(1)-O(10)#3 | 137.73(12) |
| O(8)-Dy(1)-O(2)      | 154.94(12) | O(8)-Dy(1)-O(9)#3    | 77.56(11)  |
| O(1)#1-Dy(1)-O(2)    | 107.90(11) | O(1)#1-Dy(1)-O(9)#3  | 76.86(12)  |
| O(8)-Dy(1)-O(13)     | 89.50(17)  | O(2)-Dy(1)-O(9)#3    | 125.40(11) |
| O(1)#1-Dy(1)-O(13)   | 146.81(15) | O(13)-Dy(1)-O(9)#3   | 70.04(15)  |
| O(2)-Dy(1)-O(13)     | 89.87(16)  | O(14)-Dy(1)-O(9)#3   | 144.04(12) |
| O(8)-Dy(1)-O(14)     | 87.80(12)  | O(3)#2-Dy(1)-O(9)#3  | 136.31(12) |

|                     |            |                      |            |
|---------------------|------------|----------------------|------------|
| O(1)#1-Dy(1)-O(14)  | 69.33(12)  | O(10)#3-Dy(1)-O(9)#3 | 52.74(10)  |
| O(2)-Dy(1)-O(14)    | 77.92(12)  | O(4)-Cu(1)-O(4)#4    | 180.000(1) |
| O(13)-Dy(1)-O(14)   | 143.33(14) | O(4)-Cu(1)-O(7)#2    | 89.52(14)  |
| O(8)-Dy(1)-O(3)#2   | 80.97(12)  | O(4)#4-Cu(1)-O(7)#2  | 90.48(14)  |
| O(1)#1-Dy(1)-O(3)#2 | 138.66(12) | O(4)-Cu(1)-O(7)#5    | 90.48(14)  |
| O(2)-Dy(1)-O(3)#2   | 75.01(12)  | O(4)#4-Cu(1)-O(7)#5  | 89.52(14)  |
| O(13)-Dy(1)-O(3)#2  | 72.21(15)  | O(7)#2-Cu(1)-O(7)#5  | 180.000(1) |
| O(14)-Dy(1)-O(3)#2  | 71.25(12)  | O(13)-Dy(1)-O(10)#3  | 79.34(15)  |
| O(8)-Dy(1)-O(10)#3  | 130.01(11) | O(14)-Dy(1)-O(10)#3  | 128.27(11) |
| O(2)-Dy(1)-O(10)#3  | 74.32(11)  | O(1)#1-Dy(1)-O(10)#3 | 78.93(11)  |

**6b**

|                      |            |                     |            |
|----------------------|------------|---------------------|------------|
| Dy(1)-O(8)#1         | 2.331(2)   | Dy(1)-O(3)#4        | 2.564(2)   |
| Dy(1)-O(7)           | 2.3381(19) | Cu(1)-O(10)#5       | 1.8920(19) |
| Dy(1)-O(3)#2         | 2.352(2)   | Cu(1)-O(10)         | 1.8920(19) |
| Dy(1)-O(9)#3         | 2.369(2)   | Cu(1)-O(1)#6        | 1.9838(18) |
| Dy(1)-O(13)          | 2.424(2)   | Cu(1)-O(1)#7        | 1.9838(18) |
| Dy(1)-O(2)           | 2.441(2)   | Cu(1)-O(4)#8        | 2.537(2)   |
| Dy(1)-O(4)#4         | 2.4779(19) | Cu(1)-O(4)#9        | 2.537(2)   |
| Dy(1)-O(1)           | 2.522(2)   | O(8)#1-Dy(1)-O(3)#2 | 77.56(7)   |
| O(8)#1-Dy(1)-O(7)    | 137.10(8)  | O(7)-Dy(1)-O(3)#2   | 70.94(7)   |
| O(7)-Dy(1)-O(3)#4    | 71.69(7)   | O(8)#1-Dy(1)-O(9)#3 | 75.65(7)   |
| O(3)#2-Dy(1)-O(3)#4  | 73.34(6)   | O(7)-Dy(1)-O(9)#3   | 141.32(7)  |
| O(9)#3-Dy(1)-O(3)#4  | 114.44(7)  | O(3)#2-Dy(1)-O(9)#3 | 147.53(6)  |
| O(13)-Dy(1)-O(3)#4   | 138.69(7)  | O(8)#1-Dy(1)-O(13)  | 72.72(7)   |
| O(2)-Dy(1)-O(3)#4    | 144.63(7)  | O(7)-Dy(1)-O(13)    | 126.36(8)  |
| O(4)#4-Dy(1)-O(3)#4  | 51.43(7)   | O(3)#2-Dy(1)-O(13)  | 78.87(8)   |
| O(1)-Dy(1)-O(3)#4    | 114.02(6)  | O(9)#3-Dy(1)-O(13)  | 75.92(8)   |
| O(10)#5-Cu(1)-O(10)  | 180.000(1) | O(8)#1-Dy(1)-O(2)   | 139.83(7)  |
| O(10)#5-Cu(1)-O(1)#6 | 89.66(9)   | O(7)-Dy(1)-O(2)     | 72.95(8)   |
| O(10)-Cu(1)-O(1)#6   | 90.34(9)   | O(3)#2-Dy(1)-O(2)   | 95.76(7)   |
| O(10)#5-Cu(1)-O(1)#7 | 90.34(9)   | O(9)#3-Dy(1)-O(2)   | 93.00(8)   |
| O(10)-Cu(1)-O(1)#7   | 89.66(9)   | O(13)-Dy(1)-O(2)    | 67.13(7)   |
| O(1)#6-Cu(1)-O(1)#7  | 180.000(1) | O(8)#1-Dy(1)-O(4)#4 | 96.70(7)   |
| O(10)#5-Cu(1)-O(4)#8 | 89.05(9)   | O(7)-Dy(1)-O(4)#4   | 77.44(7)   |
| O(10)-Cu(1)-O(4)#8   | 90.95(9)   | O(3)#2-Dy(1)-O(4)#4 | 122.58(7)  |
| O(1)#6-Cu(1)-O(4)#8  | 75.92(7)   | O(9)#3-Dy(1)-O(4)#4 | 78.77(7)   |
| O(1)#7-Cu(1)-O(4)#8  | 104.08(7)  | O(13)-Dy(1)-O(4)#4  | 154.28(8)  |
| O(10)#5-Cu(1)-O(4)#9 | 90.95(9)   | O(2)-Dy(1)-O(4)#4   | 119.09(6)  |
| O(10)-Cu(1)-O(4)#9   | 89.05(9)   | O(8)#1-Dy(1)-O(1)   | 146.35(7)  |
| O(1)#6-Cu(1)-O(4)#9  | 104.08(7)  | O(7)-Dy(1)-O(1)     | 71.13(8)   |
| O(1)#7-Cu(1)-O(4)#9  | 75.92(7)   | O(3)#2-Dy(1)-O(1)   | 136.04(6)  |
| O(4)#8-Cu(1)-O(4)#9  | 180.000(1) | O(9)#3-Dy(1)-O(1)   | 71.94(7)   |
| O(8)#1-Dy(1)-O(3)#4  | 71.88(7)   | O(13)-Dy(1)-O(1)    | 107.23(8)  |

**7a**

|                      |            |                      |            |
|----------------------|------------|----------------------|------------|
| Ho(1)-O(8)           | 2.254(4)   | Ho(1)-O(1)#1         | 2.284(4)   |
| Ho(1)-O(2)           | 2.285(4)   | Ho(1)-O(9)#3         | 2.512(4)   |
| Ho(1)-O(13)          | 2.348(5)   | Cu(1)-O(4)           | 1.902(4)   |
| Ho(1)-O(14)          | 2.383(4)   | Cu(1)-O(4)#4         | 1.902(4)   |
| Ho(1)-O(3)#2         | 2.410(4)   | Cu(1)-O(7)#2         | 1.960(4)   |
| Ho(1)-O(10)#3        | 2.436(4)   | Cu(1)-O(7)#5         | 1.960(4)   |
| O(8)-Ho(1)-O(1)#1    | 85.71(16)  | O(13)-Ho(1)-O(3)#2   | 72.50(18)  |
| O(8)-Ho(1)-O(2)      | 154.87(15) | O(14)-Ho(1)-O(3)#2   | 70.97(15)  |
| O(1)#1-Ho(1)-O(2)    | 107.90(15) | O(8)-Ho(1)-O(10)#3   | 130.07(14) |
| O(8)-Ho(1)-O(13)     | 89.2(2)    | O(1)#1-Ho(1)-O(10)#3 | 78.93(14)  |
| O(1)#1-Ho(1)-O(13)   | 146.67(18) | O(2)-Ho(1)-O(10)#3   | 74.30(14)  |
| O(2)-Ho(1)-O(13)     | 90.1(2)    | O(13)-Ho(1)-O(10)#3  | 79.39(18)  |
| O(8)-Ho(1)-O(14)     | 87.84(15)  | O(14)-Ho(1)-O(10)#3  | 128.30(13) |
| O(1)#1-Ho(1)-O(14)   | 69.39(14)  | O(3)#2-Ho(1)-O(10)#3 | 137.73(14) |
| O(2)-Ho(1)-O(14)     | 77.91(15)  | O(8)-Ho(1)-O(9)#3    | 77.56(14)  |
| O(13)-Ho(1)-O(14)    | 143.37(18) | O(1)#1-Ho(1)-O(9)#3  | 76.98(15)  |
| O(8)-Ho(1)-O(3)#2    | 81.02(15)  | O(2)-Ho(1)-O(9)#3    | 125.41(14) |
| O(1)#1-Ho(1)-O(3)#2  | 138.50(15) | O(13)-Ho(1)-O(9)#3   | 69.76(18)  |
| O(2)-Ho(1)-O(3)#2    | 74.83(15)  | O(14)-Ho(1)-O(9)#3   | 144.20(15) |
| O(3)#2-Ho(1)-O(9)#3  | 136.45(15) | O(4)#4-Cu(1)-O(7)#2  | 90.49(17)  |
| O(10)#3-Ho(1)-O(9)#3 | 52.80(13)  | O(4)-Cu(1)-O(7)#5    | 90.49(17)  |
| O(4)-Cu(1)-O(4)#4    | 180.000(1) | O(4)#4-Cu(1)-O(7)#5  | 89.51(17)  |
| O(4)-Cu(1)-O(7)#2    | 89.51(17)  | O(7)#2-Cu(1)-O(7)#5  | 180.000(1) |

### 7b

|                     |          |                     |          |
|---------------------|----------|---------------------|----------|
| Ho(1)-O(8)#1        | 2.321(6) | Ho(1)-O(3)#4        | 2.551(6) |
| Ho(1)-O(7)          | 2.341(6) | Cu(1)-O(10)#5       | 1.883(6) |
| Ho(1)-O(3)#2        | 2.352(6) | Cu(1)-O(10)         | 1.883(6) |
| Ho(1)-O(9)#3        | 2.362(6) | Cu(1)-O(1)#6        | 1.998(6) |
| Ho(1)-O(13)         | 2.372(7) | Cu(1)-O(1)#7        | 1.998(6) |
| Ho(1)-O(2)          | 2.434(6) | Cu(1)-O(4)#8        | 2.535(6) |
| Ho(1)-O(4)#4        | 2.470(6) | Cu(1)-O(4)#9        | 2.535(6) |
| Ho(1)-O(1)          | 2.529(6) | O(8)#1-Ho(1)-O(7)   | 137.2(2) |
| O(8)#1-Ho(1)-O(3)#2 | 78.1(2)  | O(8)#1-Ho(1)-O(1)   | 146.1(2) |
| O(7)-Ho(1)-O(3)#2   | 70.9(2)  | O(7)-Ho(1)-O(1)     | 71.8(2)  |
| O(8)#1-Ho(1)-O(9)#3 | 75.4(2)  | O(3)#2-Ho(1)-O(1)   | 135.6(2) |
| O(7)-Ho(1)-O(9)#3   | 140.4(2) | O(9)#3-Ho(1)-O(1)   | 71.4(2)  |
| O(3)#2-Ho(1)-O(9)#3 | 148.7(2) | O(13)-Ho(1)-O(1)    | 105.8(2) |
| O(8)#1-Ho(1)-O(13)  | 72.2(2)  | O(2)-Ho(1)-O(1)     | 51.7(2)  |
| O(7)-Ho(1)-O(13)    | 127.5(3) | O(4)#4-Ho(1)-O(1)   | 69.1(2)  |
| O(3)#2-Ho(1)-O(13)  | 79.4(2)  | O(8)#1-Ho(1)-O(3)#4 | 72.0(2)  |
| O(9)#3-Ho(1)-O(13)  | 76.8(3)  | O(7)-Ho(1)-O(3)#4   | 71.5(2)  |
| O(8)#1-Ho(1)-O(2)   | 141.0(2) | O(3)#2-Ho(1)-O(3)#4 | 73.7(2)  |
| O(7)-Ho(1)-O(2)     | 70.8(2)  | O(9)#3-Ho(1)-O(3)#4 | 112.7(2) |
| O(3)#2-Ho(1)-O(2)   | 93.3(2)  | O(13)-Ho(1)-O(3)#4  | 138.7(2) |

|                     |            |                      |            |
|---------------------|------------|----------------------|------------|
| O(9)#3-Ho(1)-O(2)   | 96.9(3)    | O(2)-Ho(1)-O(3)#4    | 142.3(2)   |
| O(13)-Ho(1)-O(2)    | 68.9(2)    | O(4)#4-Ho(1)-O(3)#4  | 51.45(19)  |
| O(8)#1-Ho(1)-O(4)#4 | 97.9(2)    | O(1)-Ho(1)-O(3)#4    | 115.42(19) |
| O(7)-Ho(1)-O(4)#4   | 75.9(2)    | O(10)#5-Cu(1)-O(10)  | 180.000(2) |
| O(3)#2-Ho(1)-O(4)#4 | 122.4(2)   | O(10)#5-Cu(1)-O(1)#6 | 90.2(3)    |
| O(9)#3-Ho(1)-O(4)#4 | 77.9(2)    | O(10)-Cu(1)-O(1)#6   | 89.8(3)    |
| O(13)-Ho(1)-O(4)#4  | 154.5(3)   | O(10)#5-Cu(1)-O(1)#7 | 89.8(3)    |
| O(10)-Cu(1)-O(4)#9  | 88.4(3)    | O(1)#6-Cu(1)-O(1)#7  | 180.0(4)   |
| O(1)#6-Cu(1)-O(4)#9 | 103.6(2)   | O(10)#5-Cu(1)-O(4)#8 | 88.4(3)    |
| O(1)#7-Cu(1)-O(4)#9 | 76.4(2)    | O(10)-Cu(1)-O(4)#8   | 91.6(3)    |
| O(4)#8-Cu(1)-O(4)#9 | 180.000(1) | O(1)#6-Cu(1)-O(4)#8  | 76.4(2)    |
| O(1)#7-Cu(1)-O(4)#8 | 103.6(2)   | O(10)-Cu(1)-O(1)#7   | 90.2(3)    |

### 8a

|                      |            |                      |            |
|----------------------|------------|----------------------|------------|
| Er(1)-O(8)           | 2.238(4)   | Er(1)-O(9)#3         | 2.495(4)   |
| Er(1)-O(2)           | 2.270(4)   | Er(1)-O(10)#3        | 2.419(4)   |
| Er(1)-O(1)#1         | 2.270(4)   | Cu(1)-O(4)#4         | 1.903(4)   |
| Er(1)-O(13)          | 2.338(5)   | Cu(1)-O(4)           | 1.903(4)   |
| Er(1)-O(14)          | 2.376(4)   | Cu(1)-O(7)#5         | 1.957(4)   |
| Er(1)-O(3)#2         | 2.401(4)   | Cu(1)-O(7)#2         | 1.957(4)   |
| O(8)-Er(1)-O(2)      | 154.59(15) | O(2)-Er(1)-O(3)#2    | 74.61(15)  |
| O(8)-Er(1)-O(1)#1    | 85.93(16)  | O(1)#1-Er(1)-O(3)#2  | 138.79(16) |
| O(2)-Er(1)-O(1)#1    | 107.83(15) | O(13)-Er(1)-O(3)#2   | 72.04(19)  |
| O(8)-Er(1)-O(13)     | 89.0(2)    | O(14)-Er(1)-O(3)#2   | 71.12(16)  |
| O(2)-Er(1)-O(13)     | 90.2(2)    | O(8)-Er(1)-O(10)#3   | 130.30(14) |
| O(1)#1-Er(1)-O(13)   | 146.88(19) | O(2)-Er(1)-O(10)#3   | 74.35(14)  |
| O(8)-Er(1)-O(14)     | 87.49(15)  | O(1)#1-Er(1)-O(10)#3 | 78.88(15)  |
| O(2)-Er(1)-O(14)     | 78.06(16)  | O(13)-Er(1)-O(10)#3  | 79.67(18)  |
| O(1)#1-Er(1)-O(14)   | 69.40(15)  | O(14)-Er(1)-O(10)#3  | 128.48(14) |
| O(13)-Er(1)-O(14)    | 143.09(18) | O(3)#2-Er(1)-O(10)#3 | 137.44(15) |
| O(8)-Er(1)-O(3)#2    | 81.00(15)  | O(8)-Er(1)-O(9)#3    | 77.48(14)  |
| O(14)-Er(1)-O(9)#3   | 144.30(15) | O(2)-Er(1)-O(9)#3    | 125.69(14) |
| O(3)#2-Er(1)-O(9)#3  | 135.96(16) | O(1)#1-Er(1)-O(9)#3  | 77.30(15)  |
| O(10)#3-Er(1)-O(9)#3 | 53.13(13)  | O(13)-Er(1)-O(9)#3   | 69.65(19)  |
| O(4)#4-Cu(1)-O(4)    | 180.000(1) | O(4)#4-Cu(1)-O(7)#2  | 90.72(18)  |
| O(4)#4-Cu(1)-O(7)#5  | 89.28(18)  | O(4)-Cu(1)-O(7)#2    | 89.28(18)  |
| O(4)-Cu(1)-O(7)#5    | 90.72(18)  | O(7)#5-Cu(1)-O(7)#2  | 180.000(1) |

### 8b

|              |          |               |          |
|--------------|----------|---------------|----------|
| Er(1)-O(8)#1 | 2.298(3) | Er(1)-O(3)#4  | 2.556(3) |
| Er(1)-O(7)   | 2.320(3) | Cu(1)-O(10)#5 | 1.887(3) |
| Er(1)-O(3)#2 | 2.329(3) | Cu(1)-O(10)   | 1.887(3) |
| Er(1)-O(9)#3 | 2.343(3) | Cu(1)-O(1)#6  | 1.982(2) |
| Er(1)-O(13)  | 2.390(3) | Cu(1)-O(1)#7  | 1.982(2) |
| Er(1)-O(2)   | 2.415(3) | Cu(1)-O(4)#8  | 2.537(3) |
| Er(1)-O(4)#4 | 2.448(2) | Cu(1)-O(4)#9  | 2.537(3) |

|                     |            |                      |            |
|---------------------|------------|----------------------|------------|
| Er(1)-O(1)          | 2.506(3)   | O(8)#1-Er(1)-O(7)    | 137.33(11) |
| O(8)#1-Er(1)-O(3)#2 | 77.99(10)  | O(8)#1-Er(1)-O(1)    | 146.08(10) |
| O(7)-Er(1)-O(3)#2   | 70.99(9)   | O(7)-Er(1)-O(1)      | 71.05(10)  |
| O(8)#1-Er(1)-O(9)#3 | 75.58(10)  | O(3)#2-Er(1)-O(1)    | 135.88(9)  |
| O(7)-Er(1)-O(9)#3   | 141.28(9)  | O(9)#3-Er(1)-O(1)    | 71.84(9)   |
| O(3)#2-Er(1)-O(9)#3 | 147.43(8)  | O(13)-Er(1)-O(1)     | 107.42(10) |
| O(8)#1-Er(1)-O(13)  | 72.59(10)  | O(2)-Er(1)-O(1)      | 52.34(8)   |
| O(7)-Er(1)-O(13)    | 126.56(10) | O(4)#4-Er(1)-O(1)    | 68.92(9)   |
| O(3)#2-Er(1)-O(13)  | 78.68(10)  | O(8)#1-Er(1)-O(3)#4  | 71.48(9)   |
| O(9)#3-Er(1)-O(13)  | 75.51(10)  | O(7)-Er(1)-O(3)#4    | 71.97(10)  |
| O(8)#1-Er(1)-O(2)   | 140.20(9)  | O(3)#2-Er(1)-O(3)#4  | 73.20(9)   |
| O(7)-Er(1)-O(2)     | 72.21(11)  | O(9)#3-Er(1)-O(3)#4  | 115.00(10) |
| O(3)#2-Er(1)-O(2)   | 94.77(10)  | O(13)-Er(1)-O(3)#4   | 137.98(10) |
| O(9)#3-Er(1)-O(2)   | 93.48(12)  | O(2)-Er(1)-O(3)#4    | 144.18(10) |
| O(13)-Er(1)-O(2)    | 67.62(10)  | O(4)#4-Er(1)-O(3)#4  | 51.70(9)   |
| O(8)#1-Er(1)-O(4)#4 | 95.96(9)   | O(1)-Er(1)-O(3)#4    | 114.54(8)  |
| O(3)#2-Er(1)-O(4)#4 | 122.77(9)  | O(10)#5-Cu(1)-O(1)#6 | 90.19(12)  |
| O(9)#3-Er(1)-O(4)#4 | 78.92(10)  | O(10)-Cu(1)-O(1)#6   | 89.81(12)  |
| O(13)-Er(1)-O(4)#4  | 153.87(11) | O(10)#5-Cu(1)-O(1)#7 | 89.81(12)  |
| O(2)-Er(1)-O(4)#4   | 119.74(9)  | O(10)-Cu(1)-O(1)#7   | 90.19(12)  |
| O(10)-Cu(1)-O(4)#9  | 90.50(13)  | O(1)#6-Cu(1)-O(1)#7  | 180.00(15) |
| O(1)#6-Cu(1)-O(4)#9 | 104.43(10) | O(10)#5-Cu(1)-O(4)#8 | 90.50(13)  |
| O(1)#7-Cu(1)-O(4)#9 | 75.57(10)  | O(10)-Cu(1)-O(4)#8   | 89.50(13)  |
| O(4)#8-Cu(1)-O(4)#9 | 180.000(1) | O(1)#6-Cu(1)-O(4)#8  | 75.57(10)  |
| O(10)#5-Cu(1)-O(10) | 180.000(1) | O(1)#7-Cu(1)-O(4)#8  | 104.43(10) |

Symmetry transformations used to generate equivalent atoms: For **1a**: #1 -x+1,-y+1,-z+1; #2 -x+1,-y+2,-z+1; #3 -x+1,-y+1,-z+2; #4 -x,-y+3,-z+1; #5 x-1,y+1,z; #6 x+1,y-1,z; For **1b**: #1 -x+1,-y+1,-z+1; #2 x,y,z-1; #3 -x,-y+1,-z+1; #4 x+1,y,z; #5 -x+1,-y,-z+3; #6 x,y,z+1; #7 -x+1,-y,-z+2; #8 x+1,y,z+1; #9 -x,-y,-z+2; #10 x-1,y,z; #11 x-1,y,z-1. For **2a**: #1 -x+1,-y+1,-z+1; #2 -x+1,-y+2,-z+1; #3 -x+1,-y+1,-z+2; #4 -x,-y+3,-z+1; #5 x-1,y+1,z; #6 x+1,y-1,z. For **2b**: #1 -x+1,-y+1,-z+1; #2 x,y,z-1; #3 -x,-y+1,-z+1; #4 x+1,y,z; #5 -x+1,-y,-z+3; #6 x,y,z+1; #7 -x+1,-y,-z+2; #8 x+1,y,z+1; #9 -x,-y,-z+2; #10 x-1,y,z; #11 x-1,y,z-1. For **3a**: #1 -x+1,-y+1,-z+1; #2 -x+1,-y+2,-z+1; #3 -x+1,-y+1,-z+2; #4 -x,-y+3,-z+1; #5 x-1,y+1,z; #6 x+1,y-1,z. For **3b**: #1 -x+1,-y+1,-z+1; #2 -x,-y+1,-z+1; #3 x,y,z-1; #4 x+1,y,z; #5 -x+1,-y,-z+3; #6 x,y,z+1; #7 -x+1,-y,-z+2; #8 -x,-y,-z+2; #9 x+1,y,z+1; #10 x-1,y,z; #11 x-1,y,z-1. For **4a**: #1 -x+1,-y+1,-z+1; #2 -x+1,-y+2,-z+1; #3 -x+1,-y+1,-z+2; #4 -x,-y+3,-z+1; #5 x-1,y+1,z; #6 x+1,y-1,z. For **4b**: #1 -x,-y+1,-z; #2 -x+1,-y+1,-z; #3 x,y,z-1; #4 x+1,y,z; #5 -x+1,-y,-z+2; #6 -x+1,-y,-z+1; #7 x,y,z+1; #8 x+1,y,z+1; #9 -x,-y,-z+1; #10 x-1,y,z; #11 x-1,y,z-1. For **5a**: #1 -x+1,-y+1,-z+1; #2 -x+1,-y+2,-z+1; #3 -x+1,-y+1,-z+2; #4 -x,-y+3,-z+1; #5 x-1,y+1,z; #6 x+1,y-1,z. For **5b**: #1 -x+1,-y+2,-z+1; #2 x,y,z-1; #3 -x,-y+2,-z+1; #4 x+1,y,z; #5 -x+1,-y+1,-z+3; #6 -x+1,-y+1,-z+2; #7 x,y,z+1; #8 -x,-y+1,-z+2;

#9 x+1,y,z+1; #10 x-1,y,z; #11 x-1,y,z-1. For **6a**: #1 -x+1,-y+1,-z+1; #2 -x+1,-y+2,-z+1; #3 -x+1,-y+1,-z+2; #4 -x,-y+3,-z+1; #5 x-1,y+1,z; #6 x+1,y-1,z. For **6b**: #1 -x+1,-y+1,-z+1; #2 -x,-y+1,-z+1; #3 x,y,z-1; #4 x+1,y,z; #5 -x+1,-y,-z+3; #6 x,y,z+1; #7 -x+1,-y,-z+2; #8 x+1,y,z+1; #9 -x,-y,-z+2; #10 x-1,y,z; #11 x-1,y,z-1. For **7a**: #1 -x+1,-y+1,-z+1; #2 -x+1,-y+2,-z+1; #3 -x+1,-y+1,-z+2; #4 -x,-y+3,-z+1; #5 x-1,y+1,z; #6 x+1,y-1,z. For **7b**: #1 -x+1,-y+1,-z+1; #2 -x,-y+1,-z+1; #3 x,y,z-1; #4 x+1,y,z; #5 -x+1,-y,-z+3; #6 x,y,z+1; #7 -x+1,-y,-z+2; #8 x+1,y,z+1; #9 -x,-y,-z+2; #10 x-1,y,z; #11 x-1,y,z-1. For **8a**: #1 -x+1,-y+1,-z+1; #2 -x+1,-y+2,-z+1; #3 -x+1,-y+1,-z+2; #4 -x,-y+3,-z+1; #5 x-1,y+1,z; #6 x+1,y-1,z. For **8b**: #1 -x+1,-y+1,-z+1; #2 -x,-y+1,-z+1; #3 x,y,z-1; #4 x+1,y,z; #5 -x+1,-y,-z+3; #6 -x+1,-y,-z+2; #7 x,y,z+1; #8 -x,-y,-z+2; #9 x+1,y,z+1; #10 x-1,y,z; #11 x-1,y,z-1.

**Table S4** Selected bond lengths [Å] and angles [°] for **La-1**, **La-2**, **Ce-1** and **Pr-a**.

| <b>La-1</b>          |            |                       |            |
|----------------------|------------|-----------------------|------------|
| La(1)-O(10)#1        | 2.437(4)   | La(1)-O(20)           | 2.585(4)   |
| La(1)-O(2)           | 2.454(4)   | La(1)-O(3)#2          | 2.608(4)   |
| La(1)-O(13)          | 2.509(4)   | La(1)-O(4)#2          | 2.717(4)   |
| La(1)-O(19)          | 2.513(5)   | La(1)-O(16)#3         | 2.757(4)   |
| La(1)-O(8)           | 2.524(4)   | Cu(1)-O(20)           | 2.698(4)   |
| Cu(1)-O(7)#4         | 1.920(4)   | Cu(1)-O(20)#4         | 2.698(4)   |
| Cu(1)-O(7)           | 1.920(4)   | Cu(2)-O(9)#7          | 1.975(4)   |
| Cu(1)-O(1)           | 1.967(4)   | Cu(2)-O(9)            | 1.975(4)   |
| Cu(1)-O(1)#4         | 1.967(4)   | Cu(2)-O(14)#6         | 1.897(4)   |
| Cu(2)-O(14)#5        | 1.897(4)   | O(3)#2-La(1)-C(8)#2   | 24.32(14)  |
| O(10)#1-La(1)-O(2)   | 76.73(14)  | O(2)-La(1)-O(20)      | 77.24(15)  |
| O(10)#1-La(1)-O(13)  | 82.57(14)  | O(13)-La(1)-O(20)     | 70.40(16)  |
| O(2)-La(1)-O(13)     | 145.58(14) | O(19)-La(1)-O(20)     | 120.87(18) |
| O(10)#1-La(1)-O(19)  | 143.44(15) | O(8)-La(1)-O(20)      | 67.48(15)  |
| O(2)-La(1)-O(19)     | 137.07(15) | O(3)#2-La(1)-O(20)    | 148.46(17) |
| O(13)-La(1)-O(19)    | 72.51(15)  | O(10)#1-La(1)-O(4)#2  | 71.68(15)  |
| O(10)#1-La(1)-O(8)   | 138.24(15) | O(2)-La(1)-O(4)#2     | 126.00(13) |
| O(2)-La(1)-O(8)      | 83.31(14)  | O(13)-La(1)-O(4)#2    | 70.75(13)  |
| O(13)-La(1)-O(8)     | 94.64(14)  | O(19)-La(1)-O(4)#2    | 75.00(16)  |
| O(19)-La(1)-O(8)     | 71.56(16)  | O(8)-La(1)-O(4)#2     | 146.25(14) |
| O(10)#1-La(1)-O(3)#2 | 79.02(16)  | O(3)#2-La(1)-O(4)#2   | 48.62(13)  |
| O(2)-La(1)-O(3)#2    | 83.42(15)  | O(20)-La(1)-O(4)#2    | 129.50(14) |
| O(13)-La(1)-O(3)#2   | 119.37(14) | O(10)#1-La(1)-O(16)#3 | 133.18(14) |
| O(19)-La(1)-O(3)#2   | 90.17(18)  | O(2)-La(1)-O(16)#3    | 68.44(14)  |
| O(8)-La(1)-O(3)#2    | 134.82(14) | O(13)-La(1)-O(16)#3   | 142.00(14) |



|                      |            |                       |            |
|----------------------|------------|-----------------------|------------|
| O(10)#1-La(1)-O(20)  | 72.47(16)  | O(10)#1-La(1)-C(8)#2  | 73.74(15)  |
| O(19)-La(1)-O(16)#3  | 69.99(15)  | O(2)-La(1)-C(8)#2     | 104.97(14) |
| O(8)-La(1)-O(16)#3   | 67.89(14)  | O(13)-La(1)-C(8)#2    | 95.05(14)  |
| O(3)#2-La(1)-O(16)#3 | 67.04(14)  | O(19)-La(1)-C(8)#2    | 82.10(17)  |
| O(20)-La(1)-O(16)#3  | 125.76(15) | O(8)-La(1)-C(8)#2     | 147.63(14) |
| O(4)#2-La(1)-O(16)#3 | 104.71(15) | O(14)#5-Cu(2)-O(14)#6 | 180.000(1) |
| O(20)-La(1)-C(8)#2   | 144.58(15) | O(16)#3-La(1)-C(8)#2  | 85.84(15)  |
| O(4)#2-La(1)-C(8)#2  | 24.30(13)  | O(7)-Cu(1)-O(7)#4     | 180.000(1) |
| O(14)#5-Cu(2)-O(9)   | 86.49(18)  | O(7)-Cu(1)-O(1)       | 88.59(18)  |
| O(14)#6-Cu(2)-O(9)   | 93.51(18)  | O(7)#4-Cu(1)-O(1)     | 91.41(18)  |
| O(14)#5-Cu(2)-O(9)#7 | 93.51(18)  | O(7)-Cu(1)-O(1)#4     | 91.41(18)  |
| O(14)#6-Cu(2)-O(9)#7 | 86.49(18)  | O(7)#4-Cu(1)-O(1)#4   | 88.59(18)  |
| O(9)-Cu(2)-O(9)#7    | 180.000(1) | O(1)-Cu(1)-O(1)#4     | 180.000(1) |

### La-2

|                      |            |                      |            |
|----------------------|------------|----------------------|------------|
| La(1)-O(8)#1         | 2.379(8)   | La(1)-O(2)           | 2.482(9)   |
| La(1)-O(7)           | 2.385(8)   | La(1)-O(4)#4         | 2.545(8)   |
| La(1)-O(9)#2         | 2.400(8)   | La(1)-O(3)#4         | 2.569(8)   |
| La(1)-O(3)#3         | 2.412(8)   | La(1)-O(1)           | 2.571(8)   |
| La(1)-O(13)          | 2.430(9)   | Cu(1)-O(1)#6         | 2.001(8)   |
| Cu(1)-O(10)#5        | 1.886(8)   | Cu(1)-O(1)#7         | 2.001(8)   |
| Cu(1)-O(4)#8         | 2.550(8)   | Cu(1)-O(4)           | 2.550(8)   |
| Cu(1)-O(10)          | 1.886(8)   |                      |            |
| O(8)#1-La(1)-O(7)    | 136.0(3)   | O(7)-La(1)-O(4)#4    | 76.2(3)    |
| O(8)#1-La(1)-O(9)#2  | 76.7(3)    | O(9)#2-La(1)-O(4)#4  | 78.2(3)    |
| O(7)-La(1)-O(9)#2    | 141.2(3)   | O(3)#3-La(1)-O(4)#4  | 121.6(3)   |
| O(8)#1-La(1)-O(3)#3  | 76.4(3)    | O(13)-La(1)-O(4)#4   | 155.4(3)   |
| O(7)-La(1)-O(3)#3    | 70.0(3)    | O(2)-La(1)-O(4)#4    | 116.9(3)   |
| O(9)#2-La(1)-O(3)#3  | 148.8(3)   | O(8)#1-La(1)-O(3)#4  | 72.4(3)    |
| O(8)#1-La(1)-O(13)   | 72.2(3)    | O(7)-La(1)-O(3)#4    | 71.6(3)    |
| O(7)-La(1)-O(13)     | 126.2(3)   | O(9)#2-La(1)-O(3)#4  | 112.2(3)   |
| O(9)#2-La(1)-O(13)   | 77.3(4)    | O(3)#3-La(1)-O(3)#4  | 73.9(3)    |
| O(3)#3-La(1)-O(13)   | 79.6(3)    | O(13)-La(1)-O(3)#4   | 139.7(3)   |
| O(8)#1-La(1)-O(2)    | 140.8(3)   | O(2)-La(1)-O(3)#4    | 142.7(3)   |
| O(7)-La(1)-O(2)      | 71.1(3)    | O(4)#4-La(1)-O(3)#4  | 50.6(3)    |
| O(9)#2-La(1)-O(2)    | 95.7(3)    | O(8)#1-La(1)-O(1)    | 147.7(3)   |
| O(3)#3-La(1)-O(2)    | 95.2(3)    | O(7)-La(1)-O(1)      | 72.0(3)    |
| O(13)-La(1)-O(2)     | 68.7(3)    | O(9)#2-La(1)-O(1)    | 71.6(3)    |
| O(8)#1-La(1)-O(4)#4  | 99.3(3)    | O(3)#3-La(1)-O(1)    | 135.8(3)   |
| O(13)-La(1)-O(1)     | 106.2(3)   | O(4)#4-La(1)-O(1)    | 68.4(3)    |
| O(2)-La(1)-O(1)      | 50.9(3)    | O(3)#4-La(1)-O(1)    | 114.0(2)   |
| O(10)#5-Cu(1)-O(10)  | 180.000(2) | O(10)#5-Cu(1)-O(1)#7 | 90.6(4)    |
| O(10)#5-Cu(1)-O(1)#6 | 89.4(4)    | O(10)-Cu(1)-O(1)#7   | 89.4(4)    |
| O(10)-Cu(1)-O(1)#6   | 90.6(4)    | O(1)#6-Cu(1)-O(1)#7  | 180.000(2) |

### Ce-1

|                      |            |                       |            |
|----------------------|------------|-----------------------|------------|
| Ce(1)-O(8)           | 2.405(2)   | Ce(1)-O(15)           | 2.648(3)   |
| Ce(1)-O(7)#1         | 2.409(2)   | Ce(1)-O(10)#3         | 2.691(2)   |
| Ce(1)-O(3)#2         | 2.513(2)   | Ce(1)-O(1)            | 2.698(3)   |
| Ce(1)-O(2)           | 2.562(3)   | Ce(1)-O(9)#3          | 2.773(3)   |
| Ce(1)-O(13)          | 2.564(3)   | Ce(1)-O(14)           | 2.626(2)   |
| Cu(1)-O(4)           | 1.928(2)   | Cu(1)-O(10)#5         | 1.942(2)   |
| Cu(1)-O(4)#4         | 1.928(2)   | Cu(1)-O(10)#6         | 1.942(2)   |
| O(8)-Ce(1)-O(7)#1    | 91.77(8)   | O(7)#1-Ce(1)-O(15)    | 135.80(10) |
| O(8)-Ce(1)-O(3)#2    | 152.34(9)  | O(3)#2-Ce(1)-O(15)    | 72.07(10)  |
| O(7)#1-Ce(1)-O(3)#2  | 72.13(8)   | O(2)-Ce(1)-O(15)      | 66.08(11)  |
| O(8)-Ce(1)-O(2)      | 122.86(9)  | O(13)-Ce(1)-O(15)     | 64.97(10)  |
| O(7)#1-Ce(1)-O(2)    | 81.82(9)   | O(14)-Ce(1)-O(15)     | 132.65(10) |
| O(3)#2-Ce(1)-O(2)    | 78.00(9)   | O(8)-Ce(1)-O(10)#3    | 106.35(8)  |
| O(8)-Ce(1)-O(13)     | 71.07(10)  | O(7)#1-Ce(1)-O(10)#3  | 119.77(8)  |
| O(7)#1-Ce(1)-O(13)   | 136.48(9)  | O(3)#2-Ce(1)-O(10)#3  | 65.77(8)   |
| O(3)#2-Ce(1)-O(13)   | 135.78(9)  | O(2)-Ce(1)-O(10)#3    | 126.02(8)  |
| O(2)-Ce(1)-O(13)     | 75.63(11)  | O(13)-Ce(1)-O(10)#3   | 103.56(9)  |
| O(8)-Ce(1)-O(14)     | 70.79(9)   | O(14)-Ce(1)-O(10)#3   | 67.93(8)   |
| O(7)#1-Ce(1)-O(14)   | 65.19(8)   | O(15)-Ce(1)-O(10)#3   | 65.47(10)  |
| O(3)#2-Ce(1)-O(14)   | 81.93(9)   | O(8)-Ce(1)-O(1)       | 75.13(8)   |
| O(2)-Ce(1)-O(14)     | 145.36(9)  | O(7)#1-Ce(1)-O(1)     | 68.97(8)   |
| O(13)-Ce(1)-O(14)    | 136.16(10) | O(3)#2-Ce(1)-O(1)     | 117.13(8)  |
| O(8)-Ce(1)-O(15)     | 130.75(10) | O(2)-Ce(1)-O(1)       | 49.50(8)   |
| O(3)#2-Ce(1)-O(9)#3  | 112.75(8)  | O(13)-Ce(1)-O(1)      | 68.04(9)   |
| O(2)-Ce(1)-O(9)#3    | 136.45(10) | O(14)-Ce(1)-O(1)      | 120.63(9)  |
| O(13)-Ce(1)-O(9)#3   | 67.94(10)  | O(15)-Ce(1)-O(1)      | 106.45(10) |
| O(14)-Ce(1)-O(9)#3   | 77.54(9)   | O(10)#3-Ce(1)-O(1)    | 170.76(7)  |
| O(15)-Ce(1)-O(9)#3   | 77.17(11)  | O(8)-Ce(1)-O(9)#3     | 66.42(8)   |
| O(10)#3-Ce(1)-O(9)#3 | 47.09(7)   | O(7)#1-Ce(1)-O(9)#3   | 141.58(9)  |
| O(1)-Ce(1)-O(9)#3    | 128.52(8)  | O(4)-Cu(1)-O(10)#6    | 90.54(10)  |
| O(4)-Cu(1)-O(4)#4    | 180.0      | O(4)#4-Cu(1)-O(10)#6  | 89.46(10)  |
| O(4)-Cu(1)-O(10)#5   | 89.46(10)  | O(10)#5-Cu(1)-O(10)#6 | 180.0      |
| O(4)#4-Cu(1)-O(10)#5 | 90.54(10)  |                       |            |

### Pr-a

|                   |            |                      |           |
|-------------------|------------|----------------------|-----------|
| Pr(1)-O(13)       | 2.466(4)   | Pr(1)-O(14)          | 2.472(3)  |
| Pr(1)-O(8)        | 2.382(3)   | Pr(1)-O(3)#2         | 2.486(3)  |
| Pr(1)-O(2)        | 2.394(3)   | Pr(1)-O(10)#3        | 2.513(3)  |
| Pr(1)-O(1)#1      | 2.406(3)   | Pr(1)-O(9)#3         | 2.601(3)  |
| Cu(1)-O(4)        | 1.906(3)   | Cu(1)-O(7)#2         | 1.958(3)  |
| Cu(1)-O(4)#5      | 1.906(3)   | Cu(1)-O(7)#6         | 1.958(3)  |
| O(8)-Pr(1)-O(2)   | 154.77(12) | O(8)-Pr(1)-O(1)#1    | 84.79(12) |
| O(2)-Pr(1)-O(1)#1 | 108.62(12) | O(2)-Pr(1)-O(10)#3   | 75.06(11) |
| O(8)-Pr(1)-O(13)  | 90.3(2)    | O(1)#1-Pr(1)-O(10)#3 | 79.24(11) |
| O(2)-Pr(1)-O(13)  | 89.2(2)    | O(13)-Pr(1)-O(10)#3  | 78.88(16) |

|                     |            |                      |            |
|---------------------|------------|----------------------|------------|
| O(1)#1-Pr(1)-O(13)  | 146.91(16) | O(14)-Pr(1)-O(10)#3  | 127.34(11) |
| O(8)-Pr(1)-O(14)    | 88.78(12)  | O(3)#2-Pr(1)-O(10)#3 | 139.97(11) |
| O(2)-Pr(1)-O(14)    | 77.06(12)  | O(8)-Pr(1)-O(9)#3    | 78.99(11)  |
| O(1)#1-Pr(1)-O(14)  | 68.73(12)  | O(2)-Pr(1)-O(9)#3    | 124.01(11) |
| O(13)-Pr(1)-O(14)   | 144.01(15) | O(1)#1-Pr(1)-O(9)#3  | 77.79(12)  |
| O(8)-Pr(1)-O(3)#2   | 79.44(11)  | O(13)-Pr(1)-O(9)#3   | 69.16(16)  |
| O(2)-Pr(1)-O(3)#2   | 76.26(11)  | O(14)-Pr(1)-O(9)#3   | 145.26(12) |
| O(1)#1-Pr(1)-O(3)#2 | 136.92(11) | O(3)#2-Pr(1)-O(9)#3  | 136.27(11) |
| O(13)-Pr(1)-O(3)#2  | 73.39(15)  | O(10)#3-Pr(1)-O(9)#3 | 50.92(10)  |
| O(14)-Pr(1)-O(3)#2  | 71.08(11)  | O(8)-Pr(1)-O(10)#3   | 129.48(11) |
| O(4)#4-Cu(1)-O(4)   | 180.000(1) | O(4)#4-Cu(1)-O(7)#5  | 88.75(14)  |
| O(4)#4-Cu(1)-O(7)#2 | 91.25(14)  | O(4)-Cu(1)-O(7)#5    | 91.25(14)  |
| O(4)-Cu(1)-O(7)#2   | 88.75(14)  | O(7)#2-Cu(1)-O(7)#5  | 180.00(18) |

---

Symmetry transformations used to generate equivalent atoms: For **La-1**: #1  $x+1, y, z$ ; #2  $-x+1, -y+2, -z$ ; #3  $x, y+1, z$ ; #4  $-x+1, -y+2, -z+1$ ; #5  $-x, -y+1, -z$ ; #6  $x-1, y, z$ ; #7  $-x-1, -y+1, -z$ . For **La-2**: #1  $-x+1, -y+2, -z+1$ ; #2  $x, y, z-1$ ; #3  $-x, -y+2, -z+1$ ; #4  $x+1, y, z$ ; #5  $-x+1, -y+1, -z+3$ ; #6  $x, y, z+1$ ; #7  $-x+1, -y+1, -z+2$ . For **Ce-1**: #1  $-x, -y+1, -z+1$ ; #2  $-x-1, -y+2, -z+1$ ; #3  $-x, -y+1, -z+2$ ; #4  $-x-1, -y+3, -z$ ; #5  $-x, -y+2, -z+1$ ; #6  $x-1, y+1, z-1$ . For **Pr-a**: #1  $-x+1, -y+1, -z+1$ ; #2  $-x+1, -y+2, -z+1$ ; #3  $-x+1, -y+1, -z+2$ ; #4  $-x, -y+3, -z+1$ ; #5  $x-1, y+1, z$ .

---
